# Supplementary material
Source: publisher figshare collection journal article supplement (https://acs.figshare.com/ndownloader/files/4485223)

## SUPPORTING INFORMATION

### Isolation of Ugi Four-Component Condensation Primary Adducts: A Straightforward Route to Isocoumarins

Cristina Faggi,<sup>a</sup> María García-Valverde,<sup>b</sup> Stefano Marcaccini,<sup>c</sup> and Gloria Menchi<sup>c</sup>

<sup>a</sup> CRIST, Università di Firenze, Italy; <sup>b</sup> Departamento de Química, Universidad de Burgos, Spain;

<sup>c</sup> Dipartimento di Chimica Organica, Università di Firenze, Italy

Detailed experimental procedures and characterization of compounds **13**, **14**, **15**, **17**, and **18**

S2-S6

Copies of <sup>1</sup>H NMR spectra of compounds **13**, **14**, **15**, **17**, and **18**

S7-S20

Copies of <sup>13</sup>C NMR spectra of compounds **13**, **14**, **15**, **17**, and **18**

S21-S34

## EXPERIMENTAL

### General

Melting points were determined in open capillary tubes with a Büchi 512 apparatus and are uncorrected. IR spectra were measured on a Perkin-Elmer Spectrum BX spectrophotometer for potassium bromide discs. NMR spectra were recorded on a Varian Gemini 200 operating at 200 MHz and 50.33 MHz for  $^1\text{H}$  and  $^{13}\text{C}$  acquisitions, respectively. Chemical shifts ( $\delta$ ) are reported in ppm relative to chloroform ( $\delta = 7.26, 77.23$ ).

#### 3-(N-Cyclohexyl)amino-4-[N-(2,2-dimethoxy-2-phenyl)ethyl]amino-1*H*-isochromen-1-one (**13a**)

A solution of phenacylamine dimethyl acetal (**11**) (362 mg, 2.0 mmol) and cyclohexyl isocyanide (**12a**) (218 mg, 2.0 mmol) in MeOH (1.0 mL) was added to a solution of 2-formylbenzoic acid (**10**) (278 mg, 1.85 mmol) in MeOH (2.8 mL). The resulting mixture was stirred for 18 h at rt and then cooled and filtered. The collected product was washed with a little cold pentane and dried in a oven at 50 °C to give 641 mg (82%) of **13a**. Yellow crystals, mp 148.5-150 °C (EtOH).

$^1\text{H}$  NMR:  $\delta$  8.04 (d, 1H), 7.63-7.38 (m, 6H), 7.06-6.95 (m, 2H), 4.69 (d,  $J = 8.8$  Hz, 1H), 3.44 (m, 1H), 3.28 (s, 6H), 3.18 (s, 2H), 1.92-0.86 (m, 11H).

$^{13}\text{C}$  NMR:  $\delta$  160.8, 154.0, 141.0, 140.0, 134.7, 130.4, 128.2, 127.2, 121.8, 117.9, 114.0, 102.7, 97.5, 55.3, 50.0, 49.2, 34.1, 25.7, 25.1.

IR: 3362, 2928, 2845, 1731, 1264, 1604, 1554, 1482, 1473, 1042, 762, 705  $\text{cm}^{-1}$ .

Anal. Calcd. for  $\text{C}_{25}\text{H}_{30}\text{N}_2\text{O}_4$ : C, 71.07; H, 7.16; N, 6.63. Found: C, 70.91; H, 7.15; N, 6.77.

#### 3-(N-*tert*-Butyl)amino-4-[N-(2,2-dimethoxy-2-phenyl)ethyl]amino-1*H*-isochromen-1-one (**13b**)

This compound (**13b**) was prepared analogously to **13a** by employing *tert*-butyl isocyanide (**12b**) in the place of cyclohexyl isocyanide (**12a**). Yield 72%, yellow crystals, mp 138-139 °C (*i*-Pr<sub>2</sub>O).

$^1\text{H}$  NMR:  $\delta$  8.05 (d, 1H), 7.63-7.36 (m, 8H), 7.08-6.89 (m, 2H), 5.09 (s, 1H), 3.27 (s, 6H), 3.19 (s, 2H), 1.91 (brs, 1H), 1.29 (s, 9H).

$^{13}\text{C}$  NMR:  $\delta$  160.6, 155.1, 140.6, 139.8, 134.6, 130.3, 128.2, 128.1, 127.1, 122.1, 118.1, 114.4, 102.6, 98.8, 53.2, 52.2, 49.1, 30.4.

IR: 3334, 2965, 1732, 1627, 1604, 1553, 1484, 1456, 1137, 1042, 762, 667  $\text{cm}^{-1}$ .

Anal. Calcd. for  $\text{C}_{23}\text{H}_{28}\text{N}_2\text{O}_4$ : C, 69.67; H, 7.12; N, 7.07. Found: C, 69.89; H, 6.99; N, 7.15.

#### N-Cyclohexyl-2-(2,2-dimethoxy-2-phenyl)ethyl-1,3-dihydro-1-oxoisindol-3-carboxamide (**14a**)

A drop of aq. HCl (37% HCl : water = 1:2) was added to a solution of **13a** (211 mg, 0.5 mmol) in THF (3.3 mL). The yellow color quickly disappeared. After 2 min the reaction mixture was

cautiously diluted with cold water under stirring to give **14a** in almost quantitative yield. White crystals, mp 223-225 °C from EtOH/water (2:1). Variations of the mp value were observed depending upon the heating rate.

<sup>1</sup>H NMR: δ 7.46-7.23 (m, 9H), 5.94 (d, *J* = 8.4 Hz, 1H), 4.78 (s, 1H), 4.59 (d, *J* = 14.6 Hz, 1H), 3.68 (m, 1H), 3.51 (d, *J* = 14.6 Hz, 1H), 3.28 (s, 3H), 3.26 (s, 3H), 1.98-0.82 (m, 10H).

<sup>13</sup>C NMR: δ 168.4, 166.3, 141.0, 138.1, 131.5, 129.6, 128.1, 127.9, 126.7, 123.0, 121.9, 102.1, 64.7, 49.3, 48.7, 44.6, 33.1, 32.4, 25.3, 25.2, 25.0.

IR: 3317, 2931, 2850, 1700, 1684, 1670, 1532, 1411, 1318, 1127, 1072, 1047, 731 cm<sup>-1</sup>.

*Anal.* Calcd. for C<sub>25</sub>H<sub>30</sub>N<sub>2</sub>O<sub>4</sub>: C, 71.07; H, 7.16; N, 6.63. Found: C, 71.05; H, 7.32; N, 6.47.

#### N-*tert*-Butyl-2-(2,2-dimethoxy-2-phenyl)ethyl-1,3-dihydro-1-oxoisindol-3-carboxamide (**14b**)

This compound (**14b**) was prepared analogously to **14a** by employing compound **13b** as the starting material in the place of **13a**. Yield: almost quantitative. An analytical sample was obtained from EtOH/water (1:1). The product melted at about 188 °C then resolidified and melted again at 197-198 °C.

<sup>1</sup>H NMR: δ 7.49-7.20 (m, 9H), 5.54 (s, 1H), 4.63 (d, *J* = 14.7 Hz, 1H), 4.59 (s, 1H), 3.49 (d, *J* = 14.7 Hz, 1H), 3.30 (s, 3H), 3.23 (s, 3H), 1.25 (s, 9H).

<sup>13</sup>C NMR: δ 168.7, 166.2, 141.3, 138.7, 131.8, 130.0, 128.5, 128.3, 128.2, 127.0, 123.5, 121.9, 102.0, 65.2, 51.8, 49.5, 48.9, 45.1, 28.7.

IR: 3301, 2963, 1695, 1664, 1542, 1404, 1128, 1050, 735, 699 cm<sup>-1</sup>.

*Anal.* Calcd. for C<sub>23</sub>H<sub>28</sub>N<sub>2</sub>O<sub>4</sub>: C, 69.67; H, 7.12; N, 7.07. Found: C, 69.72; H, 7.25; N, 7.00.

#### N-Cyclohexyl-1,3-dihydro-1-oxo-2-phenacylisoindol-3-carboxamide (**15a**)

A solution of **13a** (211 mg, 0.5 mmol) in THF (5.3 mL) was treated with six drops of aq. HCl (HCl 37% : water = 1:2). The resulting solution was allowed to stand at rt for 5d and then cautiously diluted with cold water under stirring to give **15a** in almost quantitative yield as white crystals. An analytical sample was obtained from EtOH/water (1:1). The product softened at about 177 °C and melted at 183-185 °C.

The same product **15a** was obtained starting from **14a** in the same conditions.

<sup>1</sup>H NMR: δ 8.00 (d, 1H), 7.83-7.44 (m, 8H), 7.31 (d, *J* = 8.1 Hz, 1H), 5.15 (s, 1H), 5.11 (d, *J* = 17.9 Hz, 1H), 4.87 (d, *J* = 17.9 Hz, 1H), 3.64 (m, 1H), 1.93-0.90 (m, 10H).

<sup>13</sup>C NMR: δ 194.1, 170.0, 166.4, 141.9, 134.5, 134.1, 132.5, 129.8, 129.0, 128.9, 128.1, 123.8, 122.9, 66.3, 49.6, 48.8, 32.8, 32.6, 25.5, 25.1, 24.9.

IR: 3278, 2938, 2856, 1701, 1690, 1651, 1545, 1408, 1228, 1004, 751, 690 cm<sup>-1</sup>.

*Anal.* Calcd. for C<sub>23</sub>H<sub>24</sub>N<sub>2</sub>O<sub>3</sub>: C, 73.38; H, 6.43; N, 7.44. Found: C, 73.52; H, 6.27; N, 7.57.

#### N-*tert*-Butyl-1,3-dihydro-1-oxo-2-phenacylisoindol-3-carboxamide (**15b**)

This compound (**15b**) was prepared analogously to **15a** starting from **13b** or **14b**. Yield: nearly quantitative. White crystals, mp 155-156 °C from EtOH/water (1:1).

<sup>1</sup>H NMR: δ 8.02 (d, 1H), 7.86-7.44 (m, 8H), 7.06 (s, 1H), 5.10 (d, *J* = 17.9 Hz, 1H), 5.05 (s, 1H), 4.87 (d, *J* = 17.9 Hz, 1H), 1.24 (s, 9H).

<sup>13</sup>C NMR: δ 193.9, 170.0, 166.6, 142.1, 134.5, 134.1, 132.5, 129.8, 128.9, 128.1, 123.8, 122.7, 67.0, 51.7, 49.6, 28.6.

IR: 3315, 2967, 1700, 1695, 1669, 1533, 1419, 1226, 1006, 735, 690 cm<sup>-1</sup>.

Anal. Calcd. for C<sub>21</sub>H<sub>22</sub>N<sub>2</sub>O<sub>3</sub>: C, 71.98; H, 6.33; N, 7.99. Found: C, 72.09; H, 6.15; N, 7.85.

### 3-(N-Substituted)amino-4-arylamino-1*H*-isochromen-1-ones (**17**)

A small flask containing a solution of 2-formylbenzoic acid (**10**) (540 mg, 3.6 mmol) in MeOH (4 mL) was poured into an oil bath (bath temperature 80 °C). When the solution began to boil a solution of the isocyanide **12** (3.8 mmol) and the aniline **16** (3.8 mmol) in MeOH (1 mL) was added and the flask lifted and maintained at such a distance from the oil surface that the temperature dropped to 40 °C within 15 min. The flask was then transferred to another bath and maintained at 40 °C (reaction mixture temperature) for 45 min. The flask was removed from the bath and allowed to cool at rt. A small magnetic bar was poured into the flask and stirring was started. After 15 min stirring at rt the reaction mixture was cooled with an ice bath and filtered to give almost pure **17**. Unless otherwise stated analytical samples were obtained from EtOH.

### 3-(N-Cyclohexyl)amino-4-(N-phenyl)amino-1*H*-isochromen-1-one (**17a**)

Yield 57%. Yellow crystals, mp 140-141 °C.

<sup>1</sup>H NMR: δ 8.10 (d, 1H), 7.44 (m, 1H), 7.27-7.05 (m, 4H), 6.84-6.57 (m, 3H), 4.81 (d, *J* = 9.2 Hz, 1H), 4.69 (s, 1H), 3.73 (m, 1H), 2.10-1.01 (m, 10H).

<sup>13</sup>C NMR: δ 160.7, 155.2, 146.3, 141.0, 135.0, 130.2, 129.5, 122.7, 119.2, 118.9, 114.4, 113.2, 91.7, 50.6, 34.3, 25.6, 25.1.

IR: 3371, 3347, 2932, 2853, 1713, 1700, 1623, 1604, 1552, 1494, 1241, 1087, 767, 748 cm<sup>-1</sup>.

Anal. Calcd. for C<sub>21</sub>H<sub>22</sub>N<sub>2</sub>O<sub>2</sub>: C, 75.42; H, 6.63; N, 8.38. Found: C, 75.35; H, 6.51; N, 8.51.

### 3-(N-Cyclohexyl)amino-4-[N-(4-fluoro)phenyl]amino-1*H*-isochromen-1-one (**17b**)

Yield 58%. Yellow crystals, mp 151-152 °C from MeOH.

<sup>1</sup>H NMR: δ 8.10 (d, 1H), 7.45 (m, 1H), 7.15-6.82 (m, 4H), 6.67-6.53 (m, 2H), 4.83 (d, *J* = 9.1 Hz, 1H), 4.65 (s, 1H), 3.72 (m, 1H), 2.07-1.01 (m, 10H).

<sup>13</sup>C NMR: δ 160.5, 156.1 (d, <sup>1</sup>*J*<sub>CF</sub> = 236 Hz), 155.0, 142.2, 140.6, 134.8, 130.0, 122.4, 118.8, 115.8 (d, <sup>2</sup>*J*<sub>CF</sub> = 23 Hz), 114.1, 113.6 (d, <sup>3</sup>*J*<sub>CF</sub> = 7 Hz), 91.6, 50.2, 33.9, 25.1, 24.6.

IR: 3376, 3340, 2937, 2853, 1709, 1696, 1624, 1606, 1555, 1508, 1483, 1336, 1215, 818, 759 cm<sup>-1</sup>.

Anal. Calcd. for C<sub>21</sub>H<sub>21</sub>FN<sub>2</sub>O<sub>2</sub>: C, 71.57; H, 6.01; N, 7.95. Found: C, 71.79; H, 6.11; N, 7.79.

4-[N-(3-Chloro)phenyl]amino-3-(N-cyclohexyl)amino-1*H*-isochromen-1-one (**17c**)

Yield 62%. Yellow crystals, mp 156-158 °C.

<sup>1</sup>H NMR: δ 8.08 (d, 1H), 7.47 (m, 1H), 7.15-7.03 (m, 3H), 6.78-6.48 (m, 3H), 4.80 (s, 1H), 4.73 (d, *J* = 8.8 Hz, 1H), 3.73 (m, 1H), 2.06-1.02 (m, 10H).

<sup>13</sup>C NMR: δ 160.6, 155.0, 147.6, 140.6, 135.3, 135.1, 130.6, 130.3, 122.8, 119.0, 114.4, 113.1, 111.4, 90.8, 50.6, 34.3, 25.6, 25.0.

IR: 3409, 3342, 2930, 2844, 1712, 1696, 1605, 1594, 1551, 1473, 1334, 1160, 1086, 848, 763, 678 cm<sup>-1</sup>.

Anal. Calcd. for C<sub>21</sub>H<sub>21</sub>ClN<sub>2</sub>O<sub>2</sub>: C, 68.38; H, 5.74; N, 7.59. Found: C, 68.12; H, 5.56; N, 7.72.

4-[N-(4-Chloro)phenyl]amino-3-(N-cyclohexyl)amino-1*H*-isochromen-1-one (**17d**)

Yield 68%. Yellow crystals, mp 173-175 °C.

<sup>1</sup>H NMR: δ 8.10 (d, 1H), 7.45 (m, 1H), 7.20-6.98 (m, 4H), 6.66-6.53 (m, 2H), 4.76 (d, *J* = 8.8 Hz, 1H), 4.74 (s, 1H), 3.72 (m, 1H), 2.07-1.00 (m, 10H).

<sup>13</sup>C NMR: δ 160.6, 155.1, 145.0, 140.7, 135.0, 130.2, 129.4, 123.4, 122.8, 119.1, 114.4, 114.3, 91.4, 50.6, 34.3, 25.6, 25.0.

IR: 3367, 3302, 2925, 2853, 1723, 1624, 1603, 1550, 1492, 1482, 1305, 1094, 818, 767 cm<sup>-1</sup>.

Anal. Calcd. for C<sub>21</sub>H<sub>21</sub>ClN<sub>2</sub>O<sub>2</sub>: C, 68.38; H, 5.74; N, 7.59. Found: C, 68.22; H, 5.90; N, 7.43.

4-[N-(4-Fluoro)phenyl]amino-3-[N-(4-methyl)phenyl]amino-1*H*-isochromen-1-one (**17e**)

Yield 64%. Yellow crystals, mp 163-165 °C.

<sup>1</sup>H NMR: δ 8.13 (d, 1H), 7.50 (m, 1H), 7.24-7.03 (m, 6H), 7.01-6.81 (m, 3H), 6.72-6.57 (m, 2H), 4.82 (s, 1H), 2.31 (s, 3H).

<sup>13</sup>C NMR: δ 159.7, 156.4 (d, <sup>1</sup>*J*<sub>CF</sub> = 236 Hz), 152.0, 141.9, 139.7, 135.1, 134.9, 132.8, 130.0, 129.5, 123.6, 119.7, 119.6, 115.8 (d, <sup>2</sup>*J*<sub>CF</sub> = 23 Hz), 115.4, 114.0 (d, d, <sup>3</sup>*J*<sub>CF</sub> = 7 Hz), 94.0, 20.5.

IR: 3379, 3336, 3032, 1724, 1634, 1605, 1556, 1508, 1482, 1385, 1329, 1206, 824, 759 cm<sup>-1</sup>.

Anal. Calcd. for C<sub>22</sub>H<sub>17</sub>FN<sub>2</sub>O<sub>2</sub>: C, 73.32; H, 4.75; N, 7.77. Found: C, 73.54; H, 4.62; N, 7.89.

3-(N-Cyclohexyl)amino-4-[N-(4-methyl)phenyl]amino-1*H*-isochromen-1-one (**17f**)

Yield 82%. Yellow crystals, mp 148-149 °C from MeOH.

<sup>1</sup>H NMR: δ 8.10 (d, 1H), 7.43 (m, 1H), 7.15-6.92 (m, 4H), 6.63-6.50 (m, 2H), 4.83 (d, *J* = 9.1 Hz, 1H), 4.57 (s, 1H), 3.72 (m, 1H), 2.25 (s, 3H), 2.05-1.03 (m, 10H).

<sup>13</sup>C NMR: δ 160.6, 155.0, 143.7, 140.8, 134.7, 129.9, 129.8, 122.3, 119.0, 114.1, 113.0, 91.7, 50.2, 33.9, 25.2, 24.6, 20.2.

IR: 3370, 3304, 2923, 2854, 1724, 1615, 1603, 1556, 1514, 1482, 1307, 1243, 1094, 810, 755 cm<sup>-1</sup>.

Anal. Calcd. for C<sub>22</sub>H<sub>24</sub>N<sub>2</sub>O<sub>2</sub>: C, 75.83; H, 6.94; N, 8.04. Found: C, 75.99; H, 7.05; N, 7.87.

N-Cyclohexyl-2-(3-chloro)phenyl-1,3-dihydro-1-oxoisindol-3-carboxamide (**18c**)

This compound (**18c**) was prepared analogously to **14a** by employing compound **17c** as the starting material in the place of **13a**. Yield: almost quantitative. An analytical sample was obtained from EtOH. White crystals, mp 223-224 °C.

<sup>1</sup>H NMR: δ 7.98 (m, 1H), 7.82-7.13 (m, 7H), 5.98 (d, *J* = 8.4 Hz, 1H), 5.56 (s, 1H), 3.69 (m, 1H), 1.73-0.77 (m, 10H).

<sup>13</sup>C NMR: δ 168.1, 166.2, 140.2, 139.2, 137.4, 135.2, 133.3, 130.2, 129.4, 125.1, 124.2, 122.7, 119.9, 117.4, 65.5, 48.7, 32.4, 32.3, 25.2, 24.6.

IR: 3265, 3078, 2935, 2854, 1712, 1660, 1595, 1485, 1369, 1359, 1245, 1106, 768, 730, 677 cm<sup>-1</sup>.

*Anal.* Calcd. for C<sub>21</sub>H<sub>21</sub>ClN<sub>2</sub>O<sub>2</sub>: C, 68.38; H, 5.74; N, 7.59. Found: C, 68.12; H, 5.54; N, 7.66.

N-Cyclohexyl-1,3-dihydro-2-(4-methyl)phenyl-1-oxoisindol-3-carboxamide (**18f**)

This compound (**18f**) was prepared analogously to **14a** by employing compound **17f** as the starting material in the place of **13a**. Yield: almost quantitative. An analytical sample was obtained from EtOH. White crystals, mp 227-228 °C.

<sup>1</sup>H NMR: δ 7.84-7.42 (m, 6H), 7.25-7.12 (m, 2H), 5.75 (d, *J* = 8.4 Hz, 1H), 5.58 (s, 1H), 3.63 (m, 1H), 2.35 (s, 3H), 1.65-0.72 (m, 10H).

<sup>13</sup>C NMR: δ 167.9, 166.5, 140.3, 135.3, 134.9, 132.7, 130.9, 129.8, 129.1, 124.0, 122.6, 120.2, 65.6, 48.6, 32.5, 25.4, 24.7, 24.6, 21.1.

IR: 3267, 3078, 2923, 2853, 1702, 1653, 1554, 1517, 1374, 1245, 1106, 806, 723 cm<sup>-1</sup>.

*Anal.* Calcd. for C<sub>22</sub>H<sub>24</sub>N<sub>2</sub>O<sub>2</sub>: C, 75.83; H, 6.94; N, 8.04. Found: C, 75.88; H, 6.71; N, 7.91.

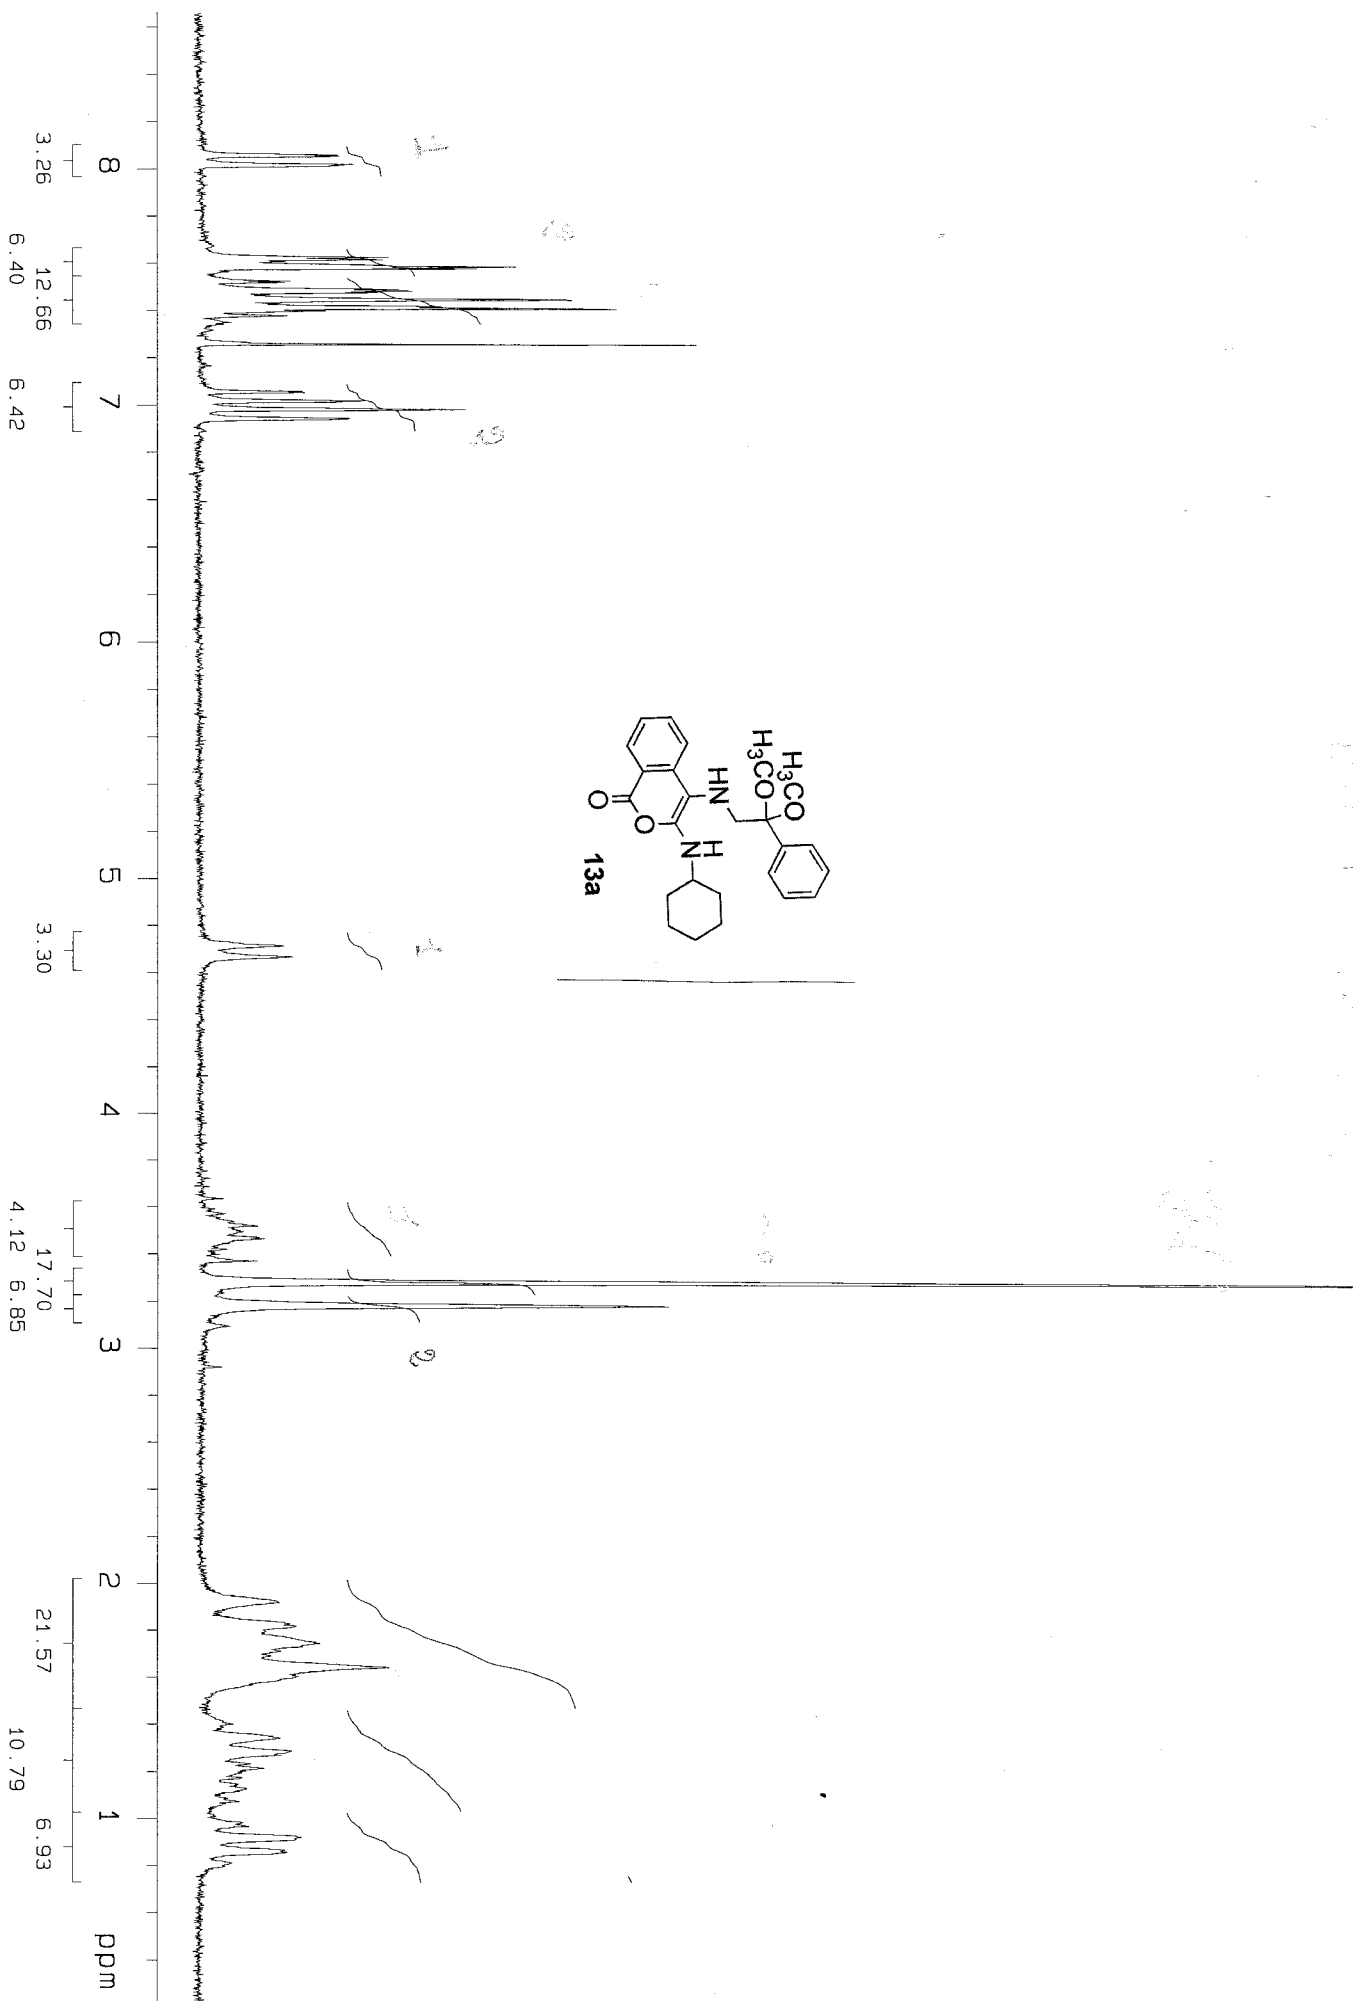

STANDARD 1H OBSERVE  
Pulse Sequence: s2pu1

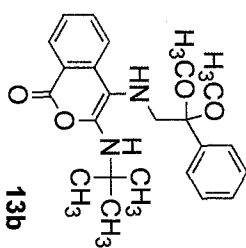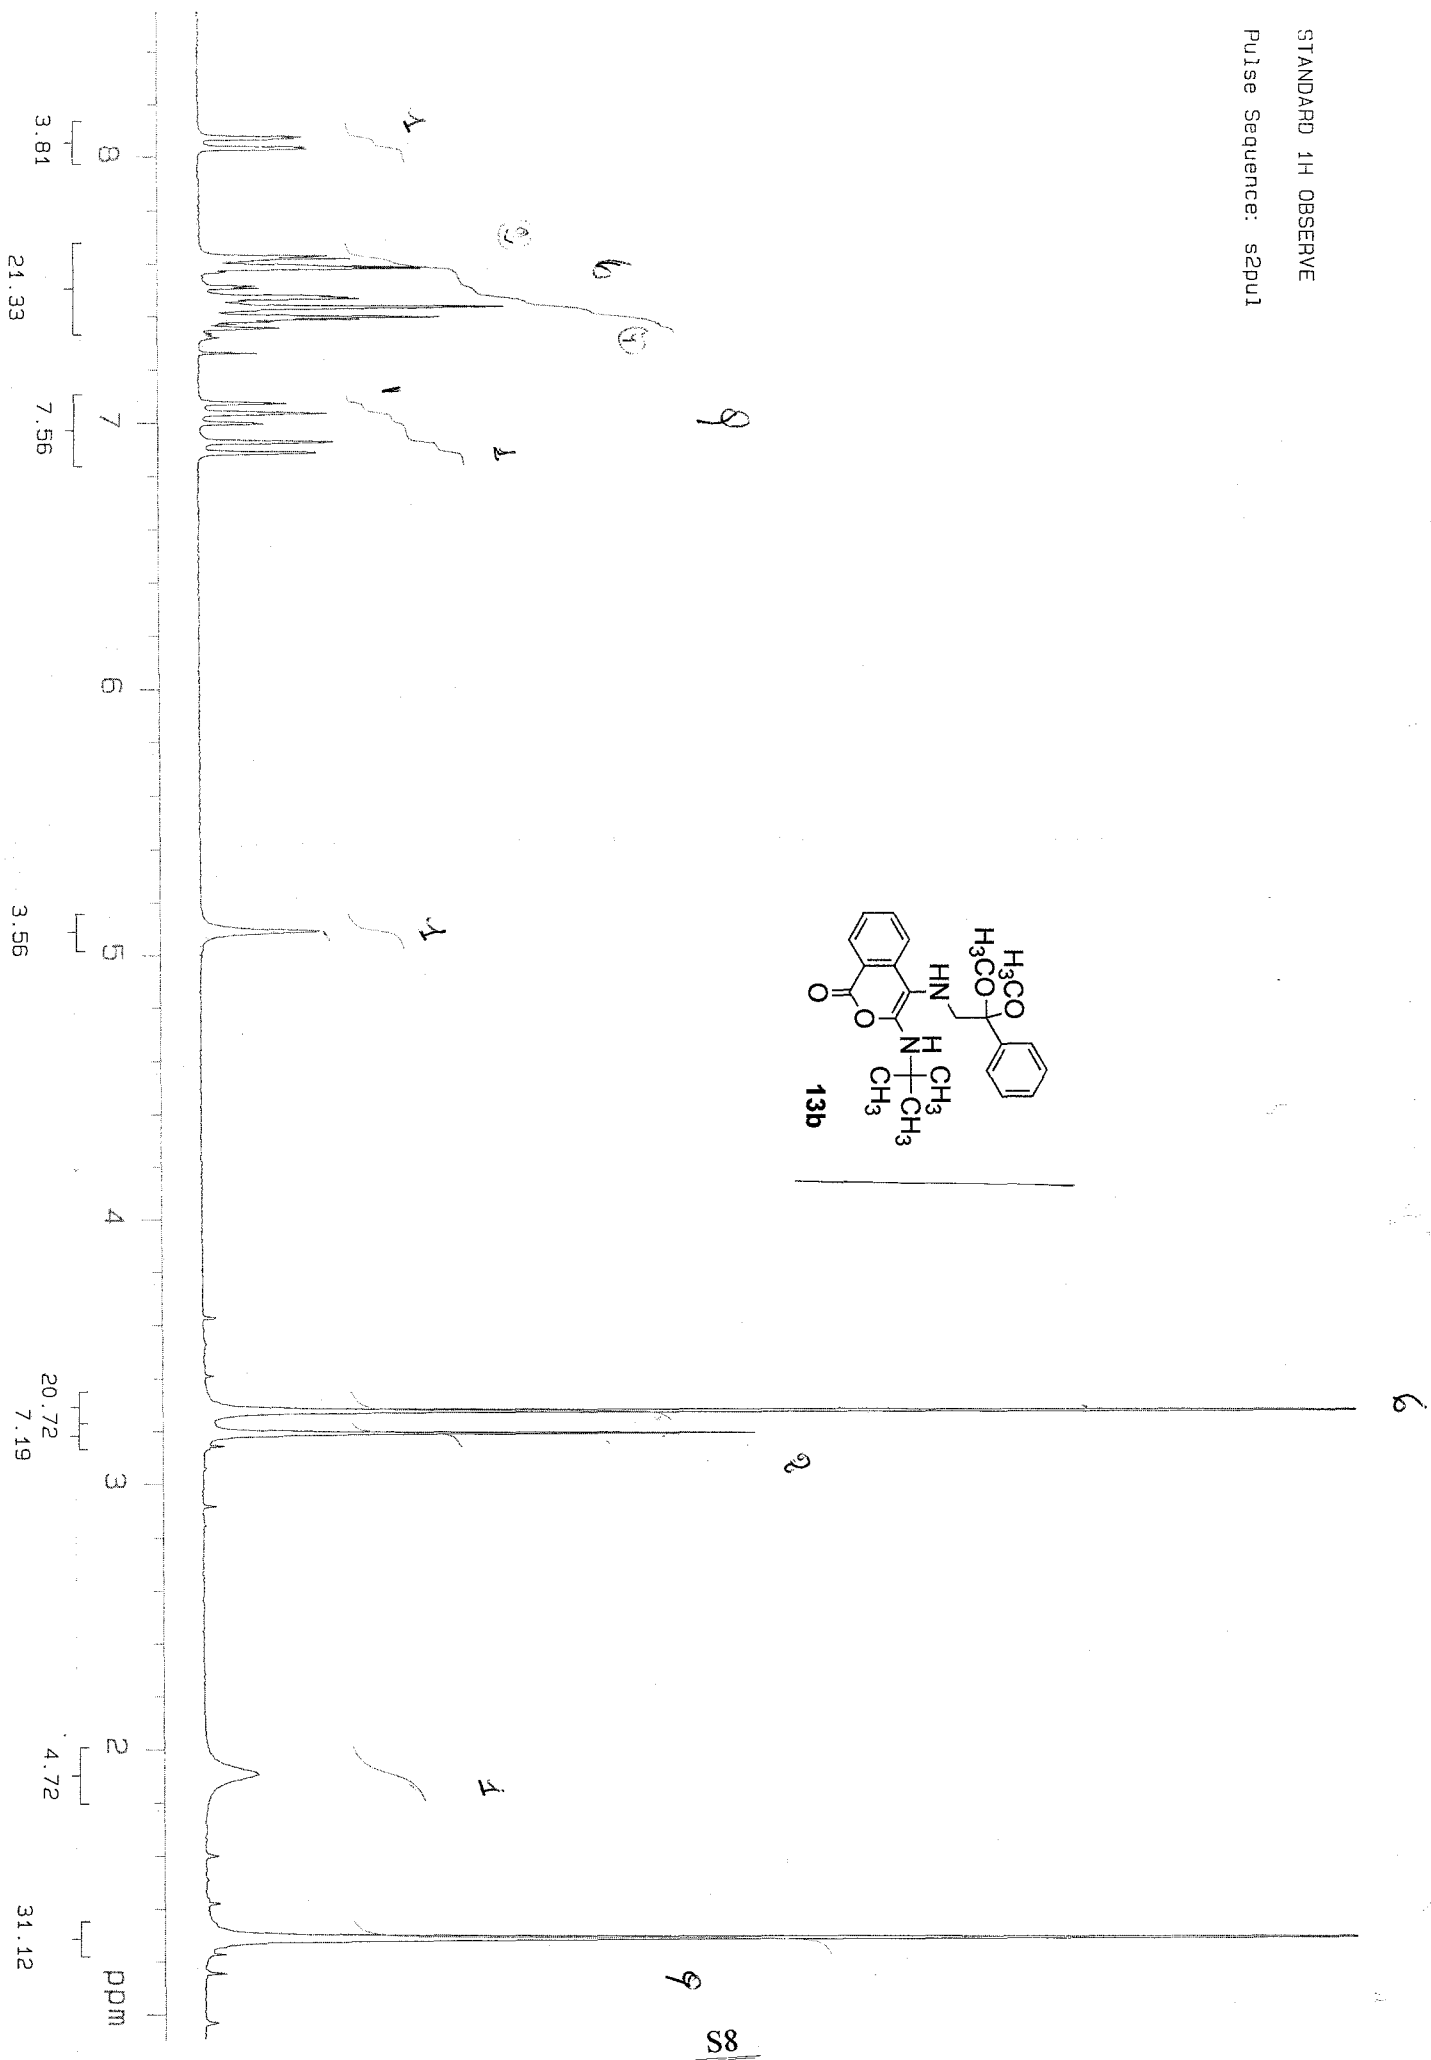

prodotto giallo trattato con HCl  
Pulse Sequence: s2pu1

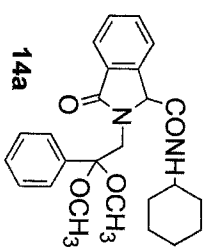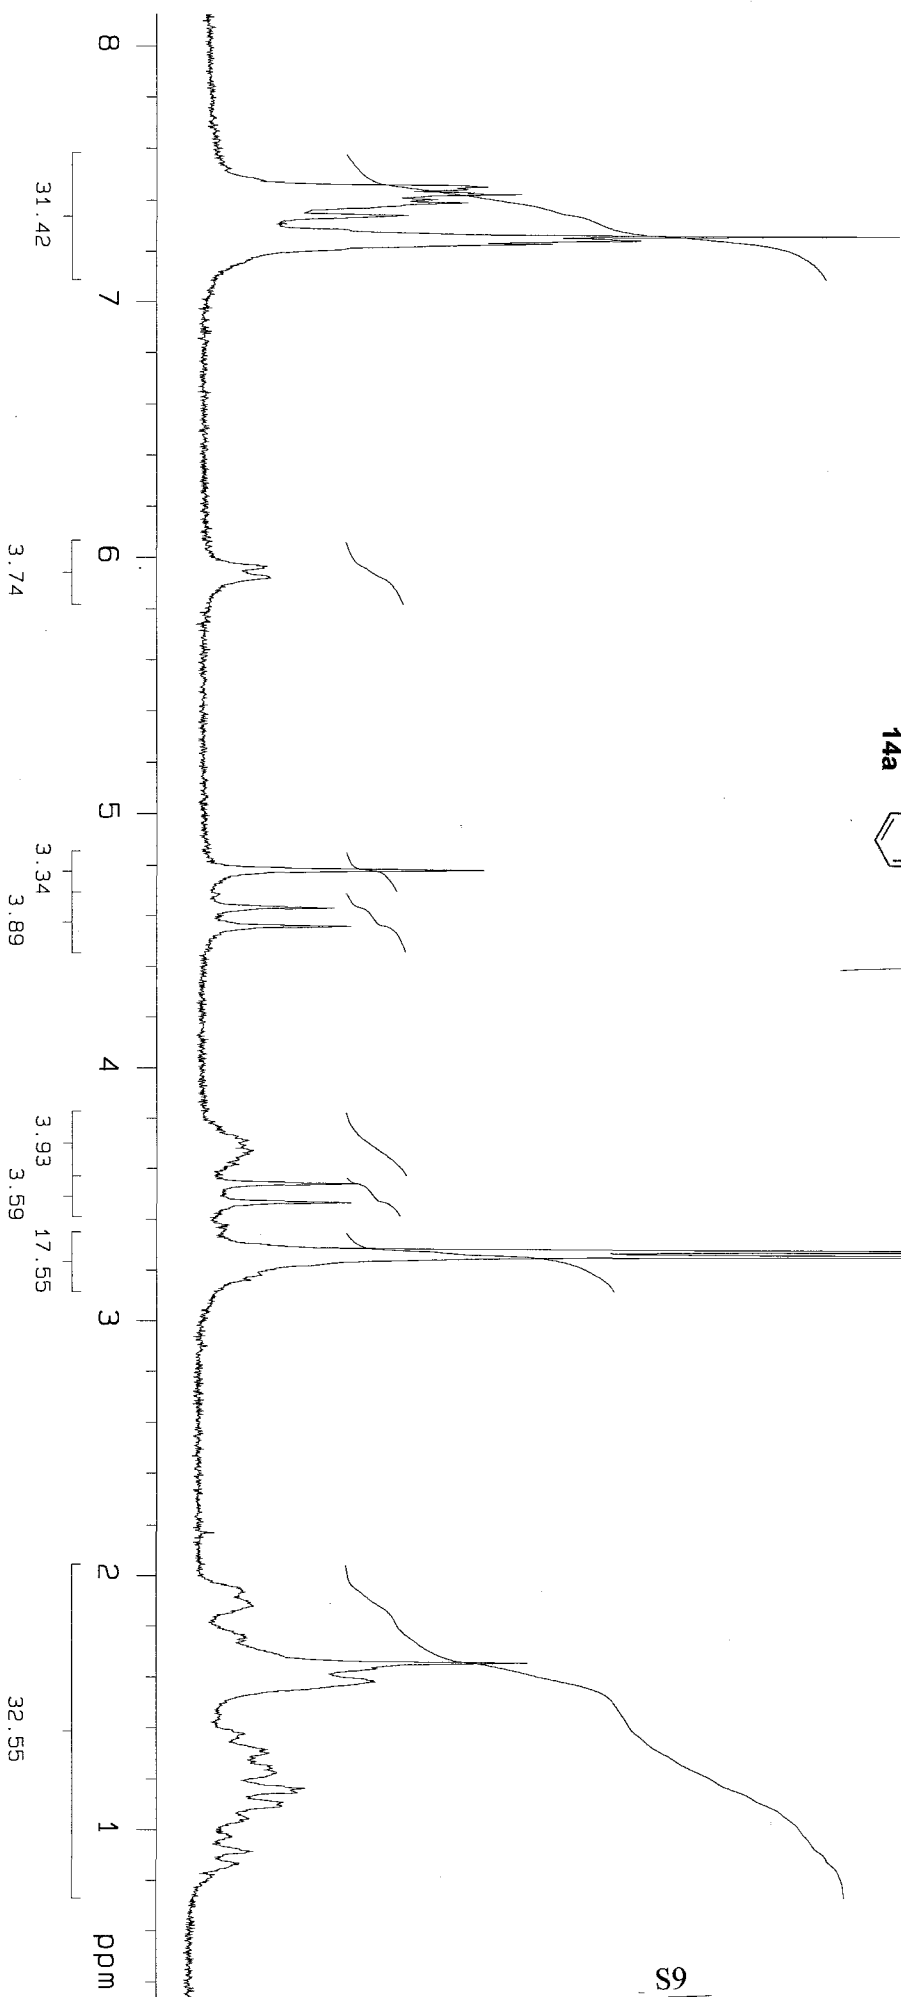

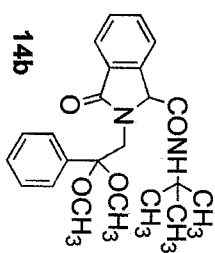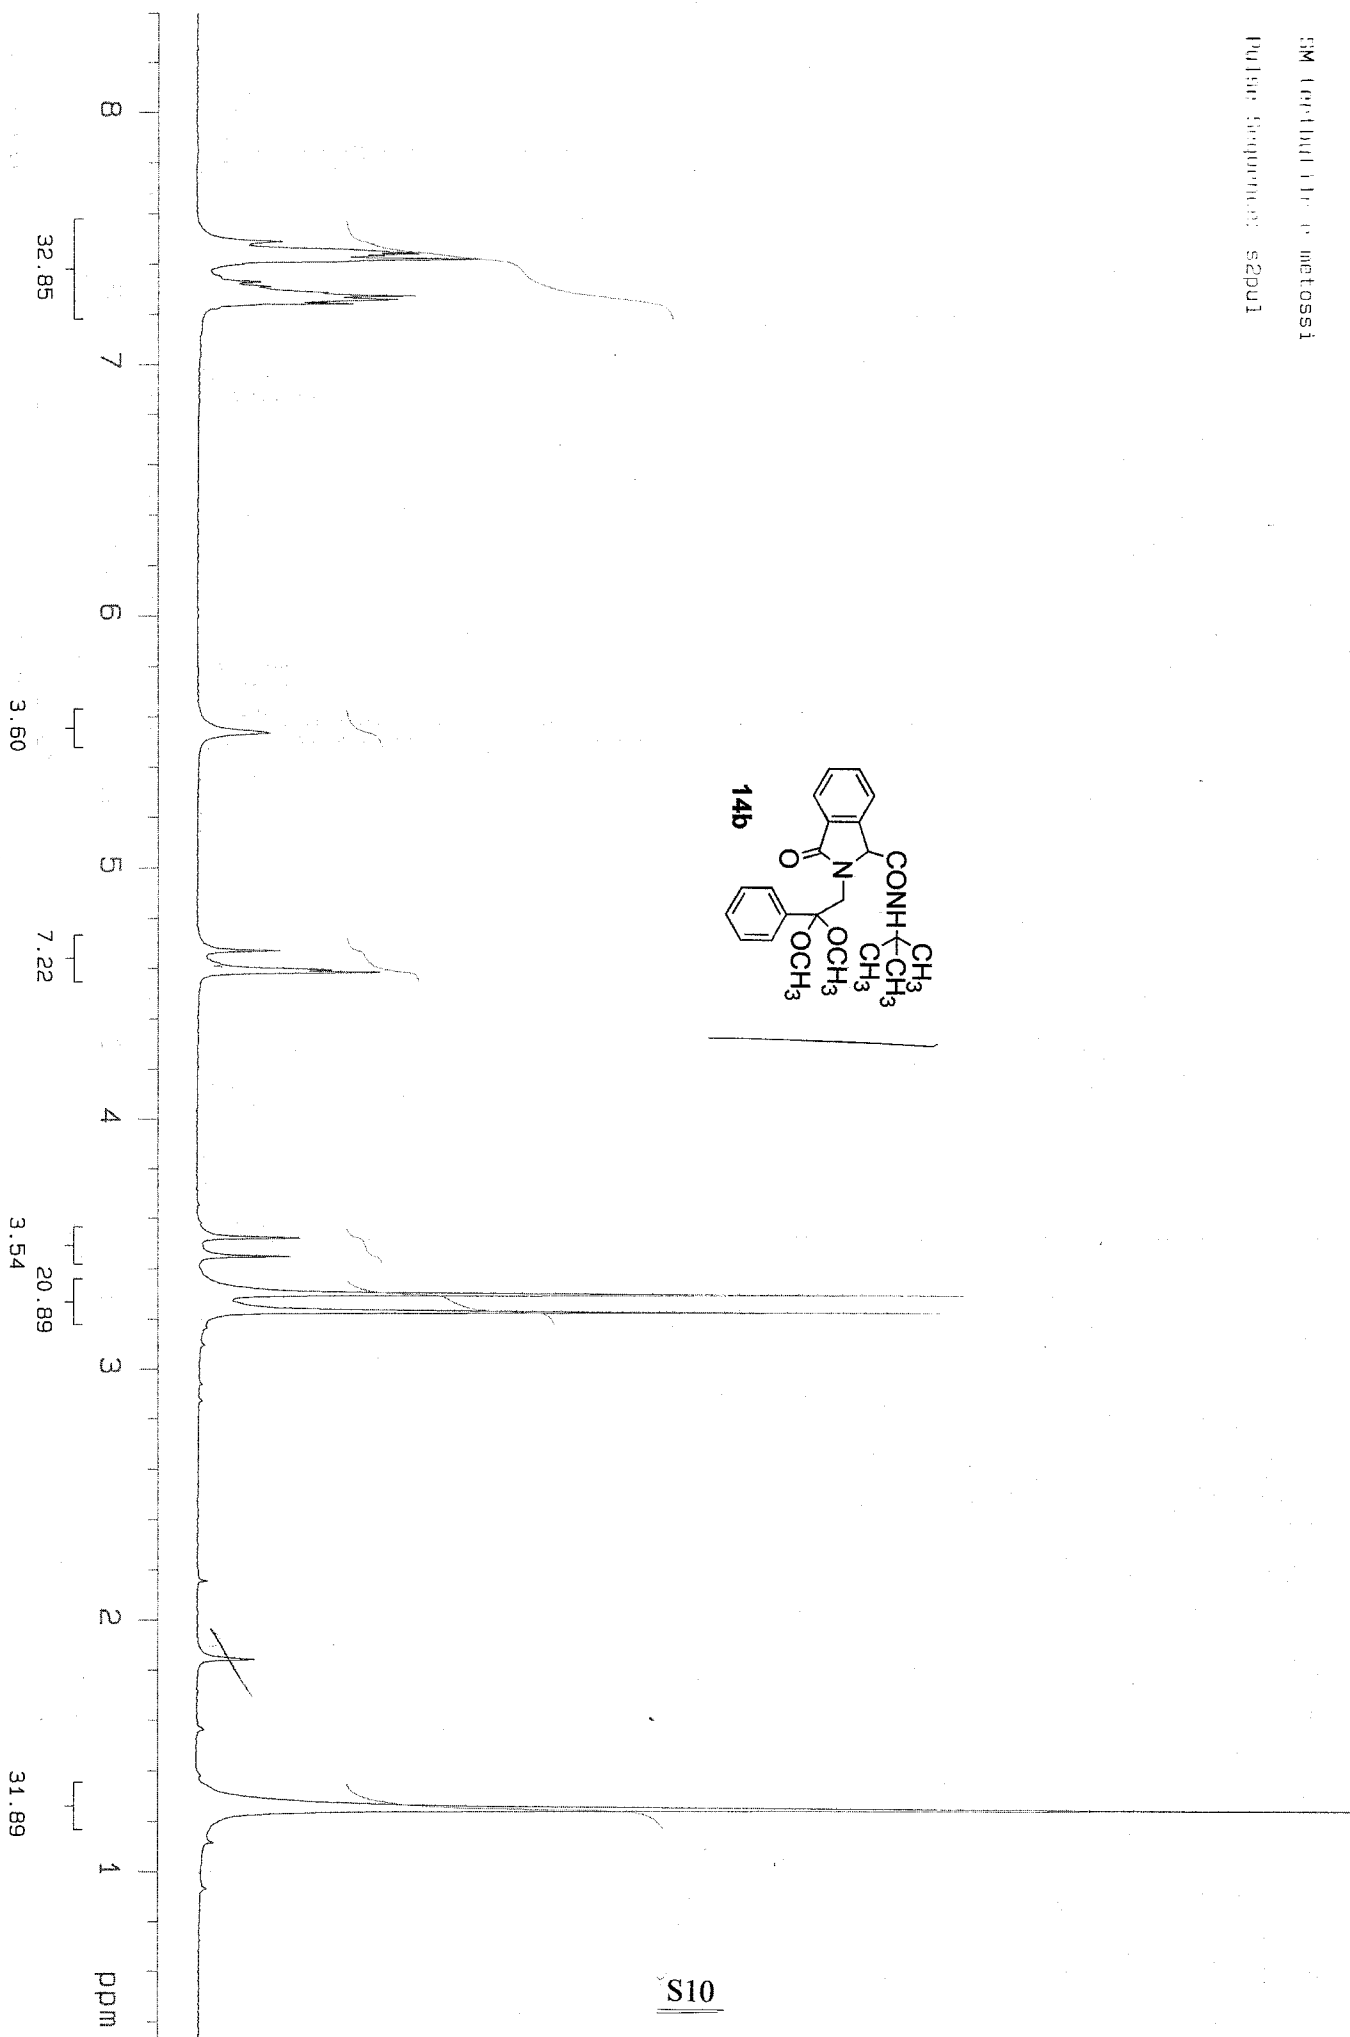

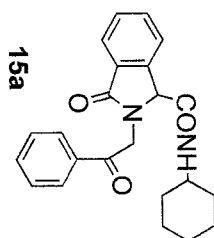

15a

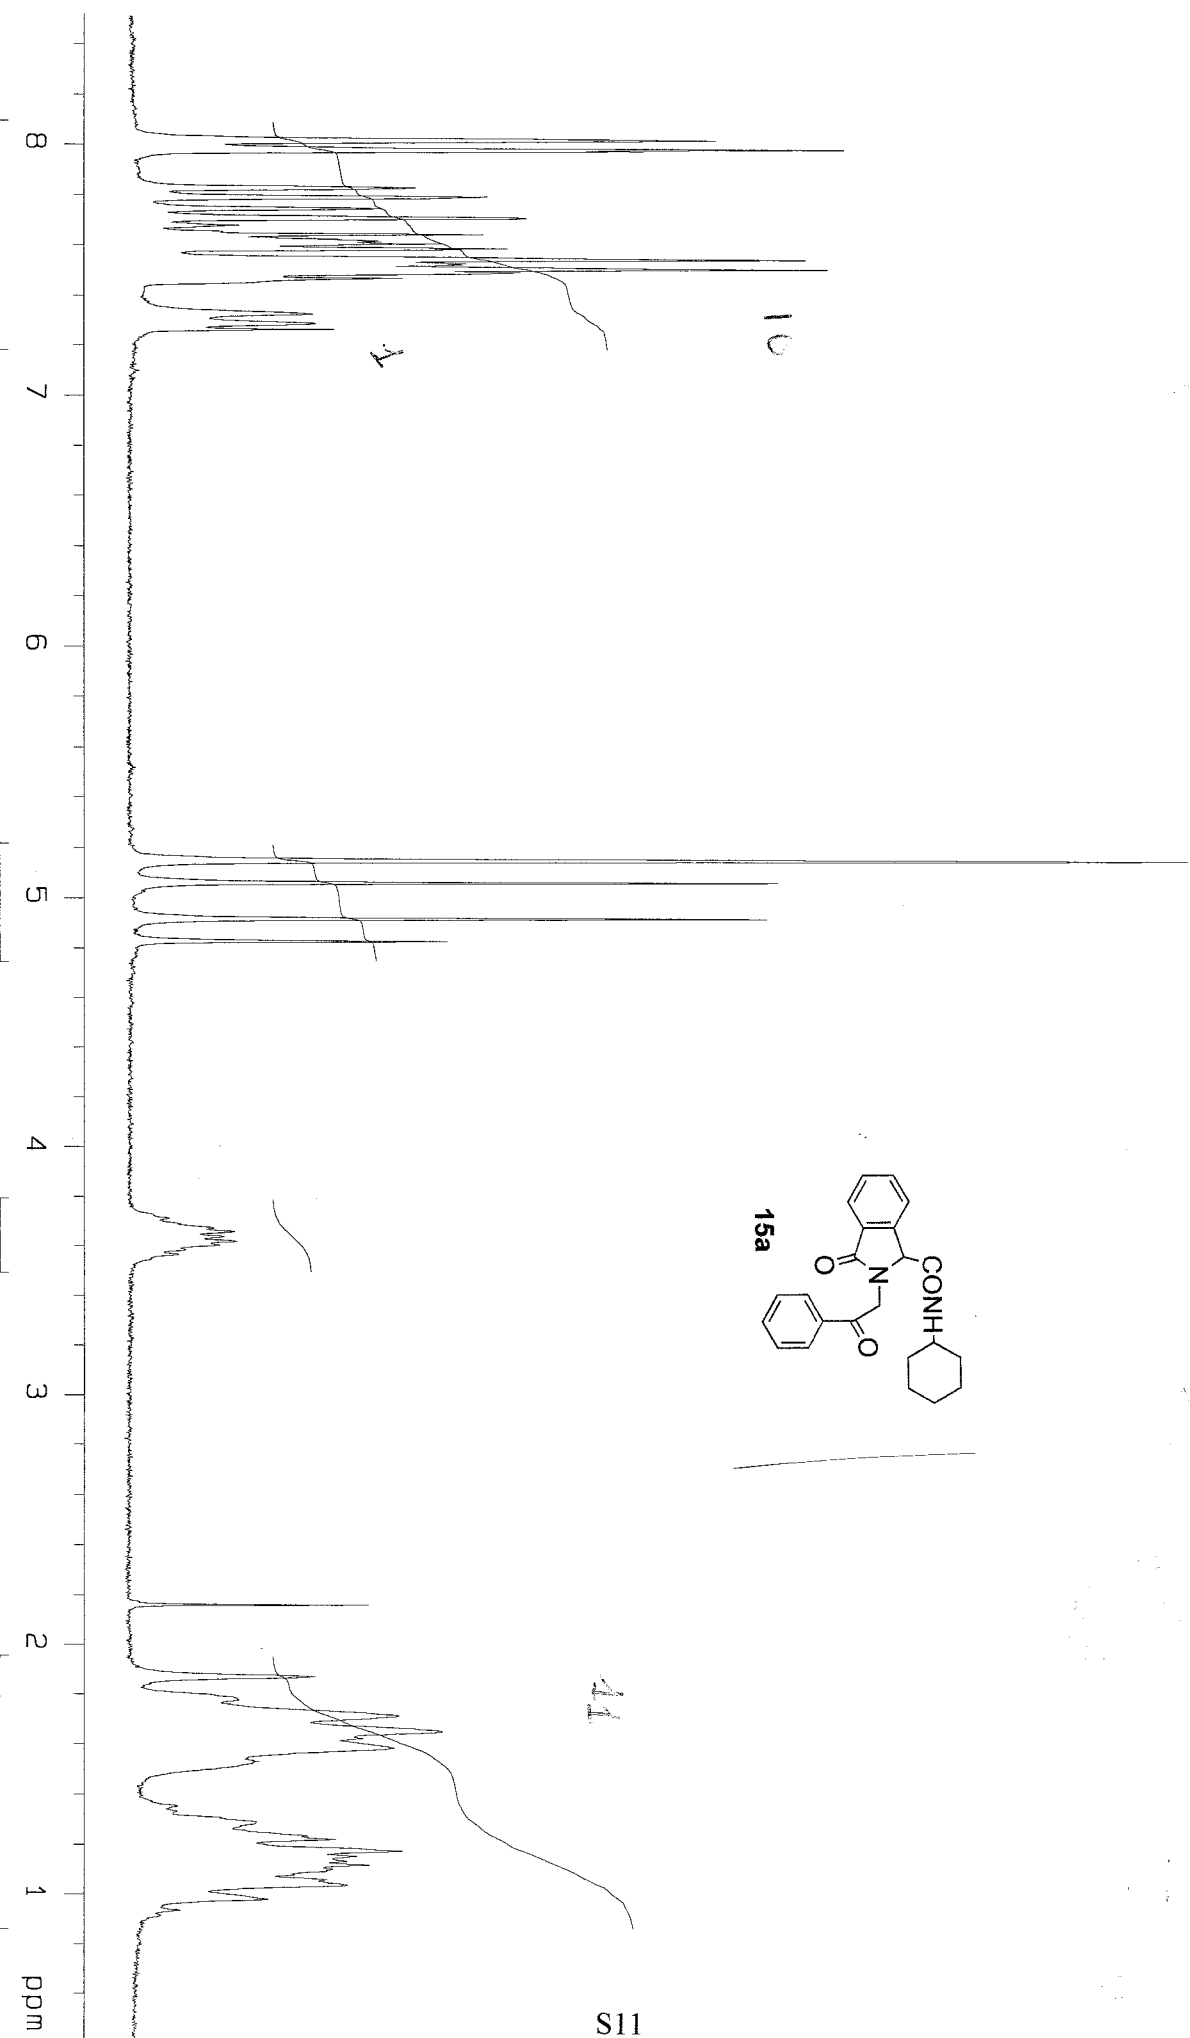

3M level but 1e deprotection  
Pulse Sequence: s2pu1

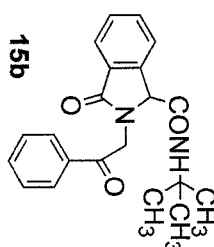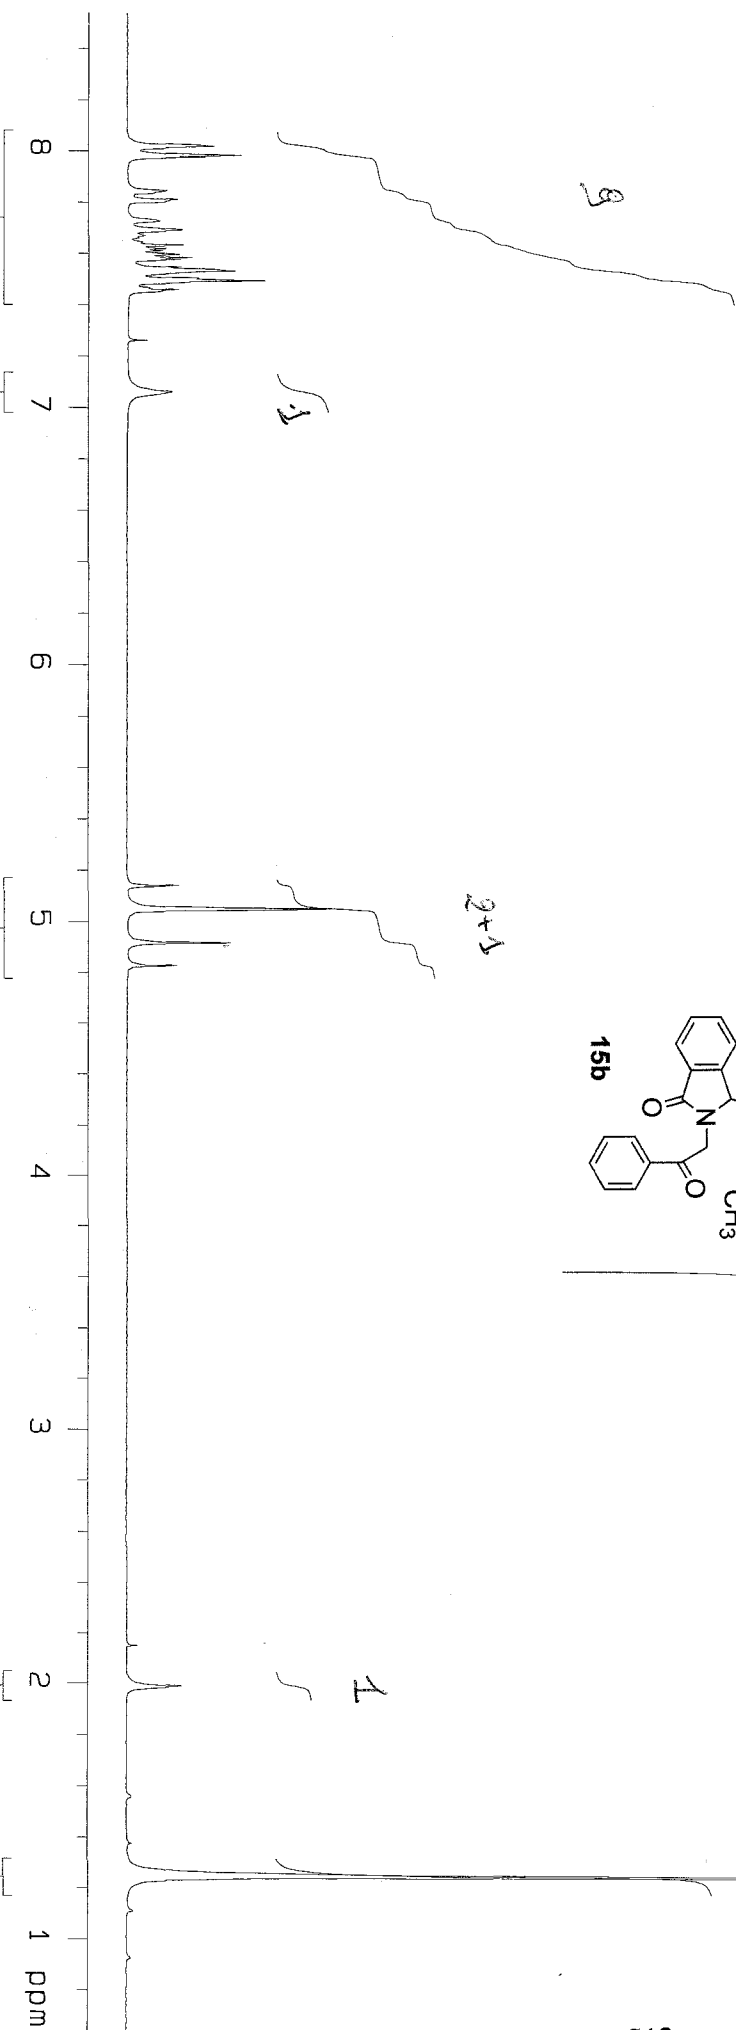

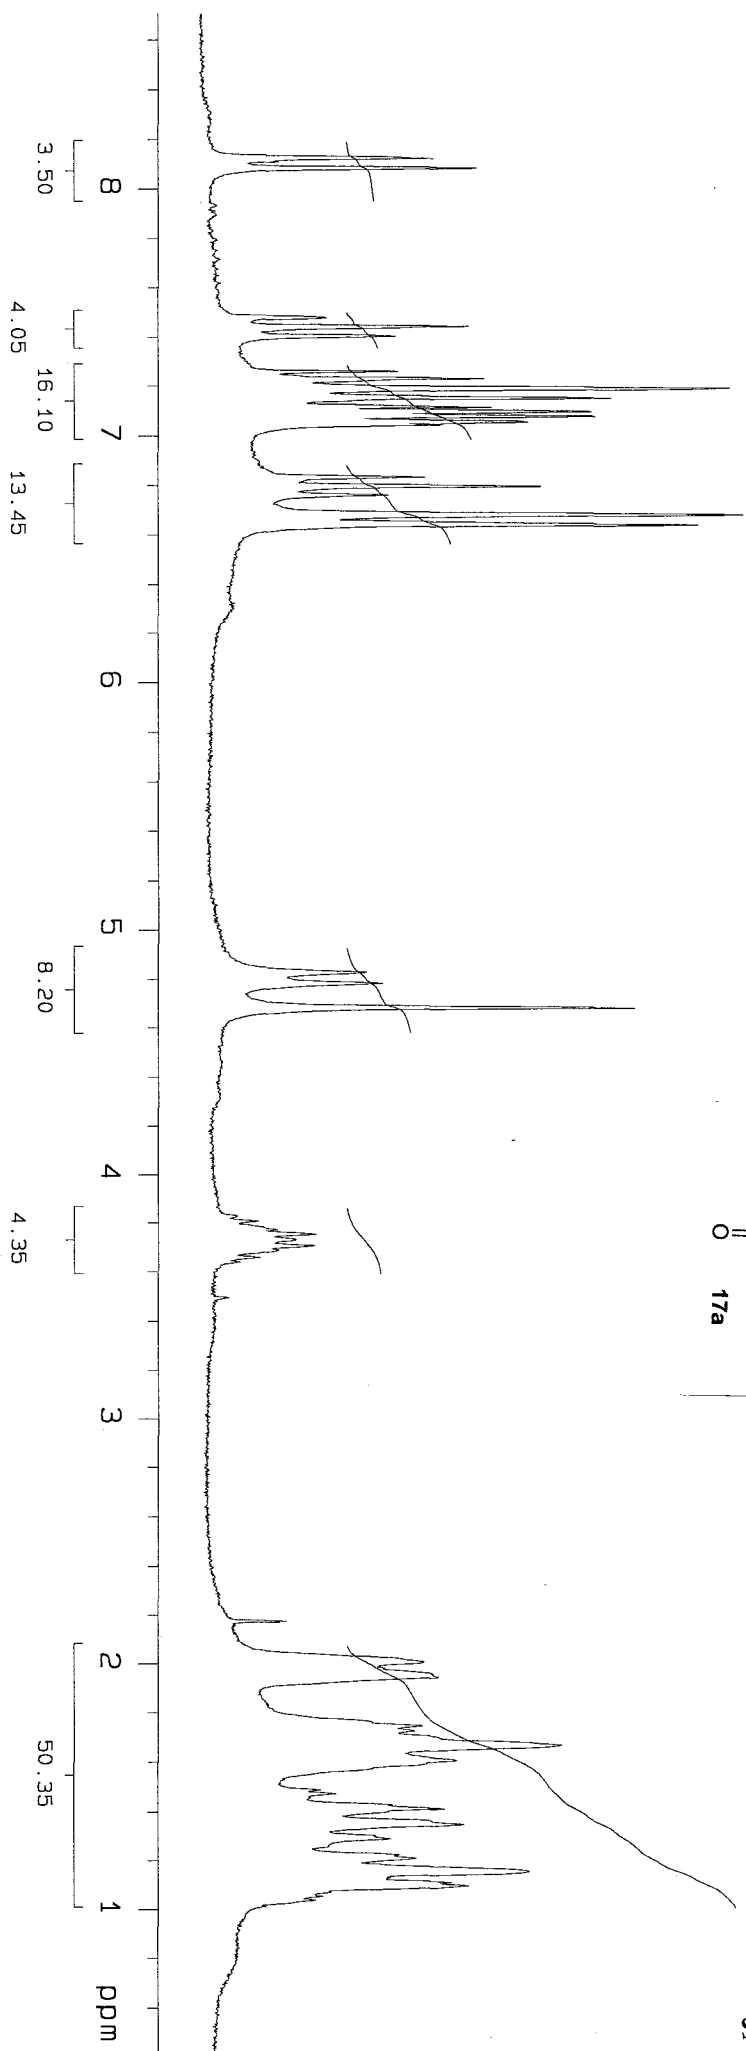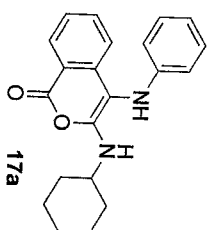

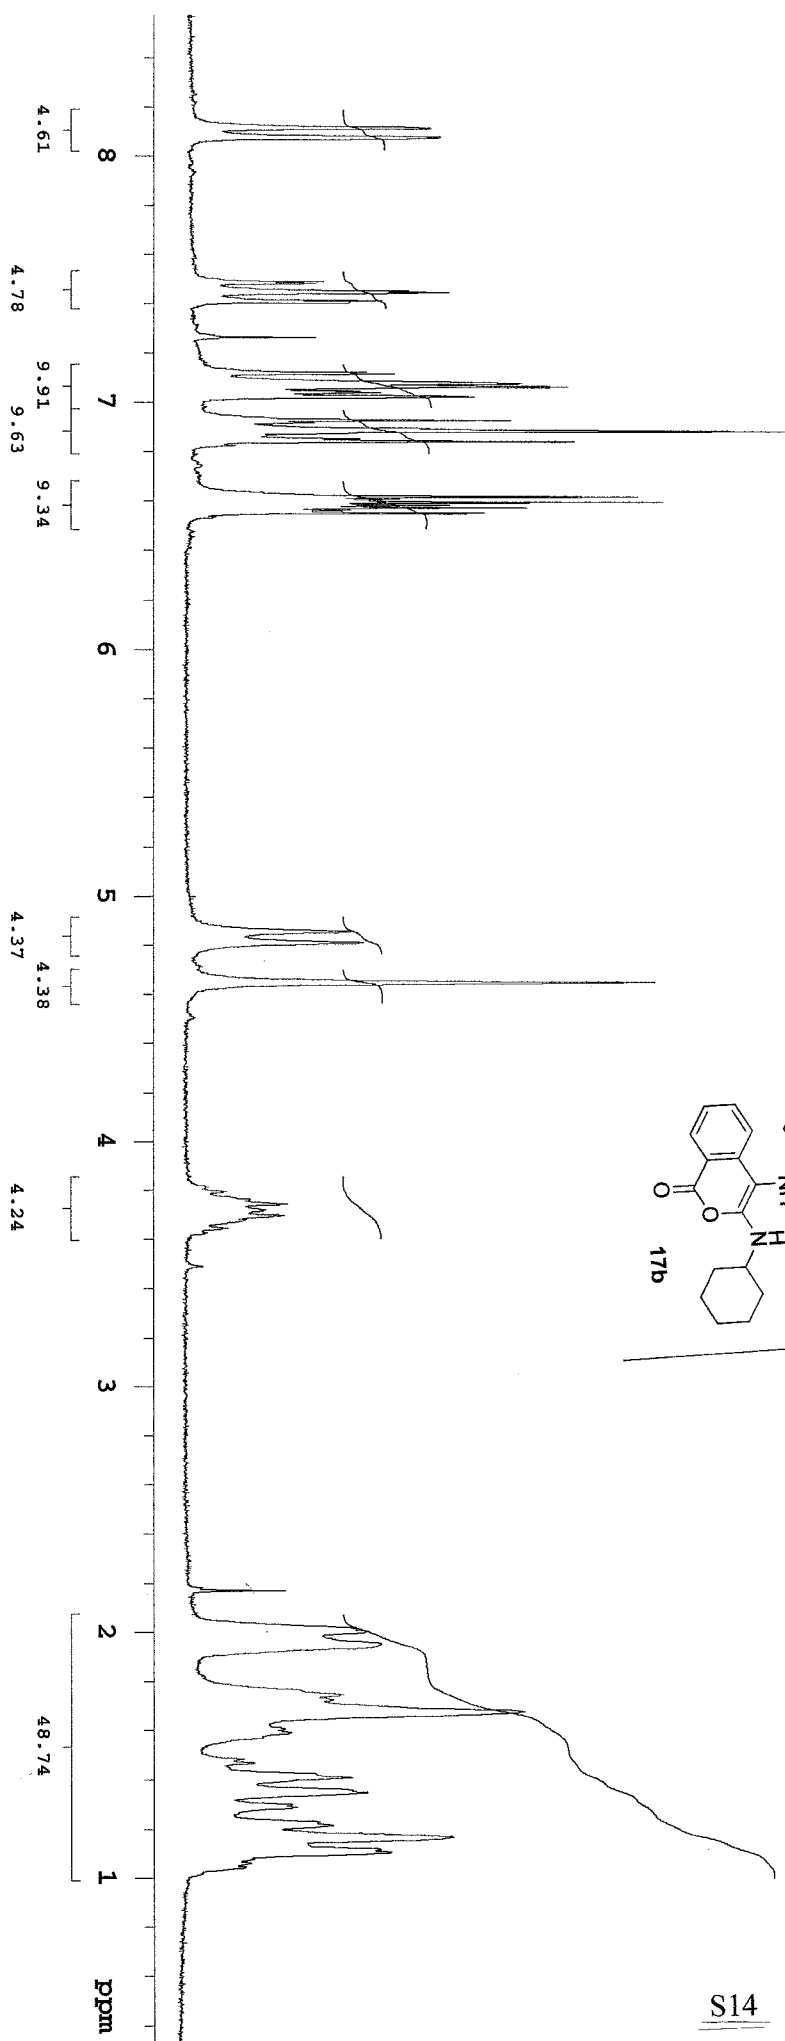

CC01

Pulse Sequence: s2pul

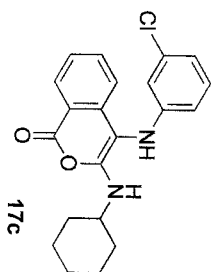

17c

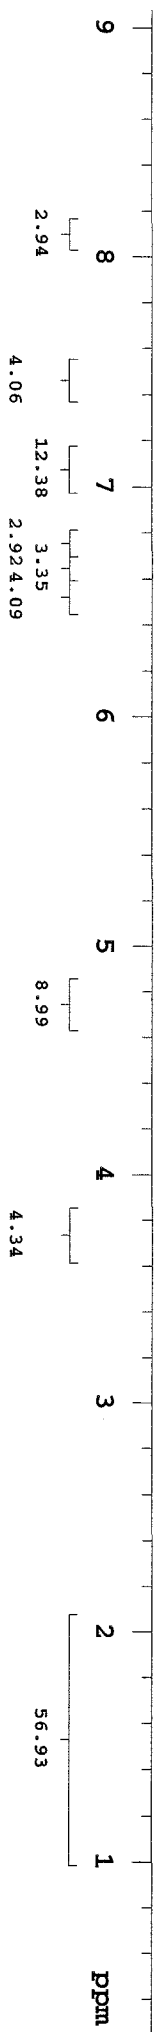

Pulse Sequence: s2pu1

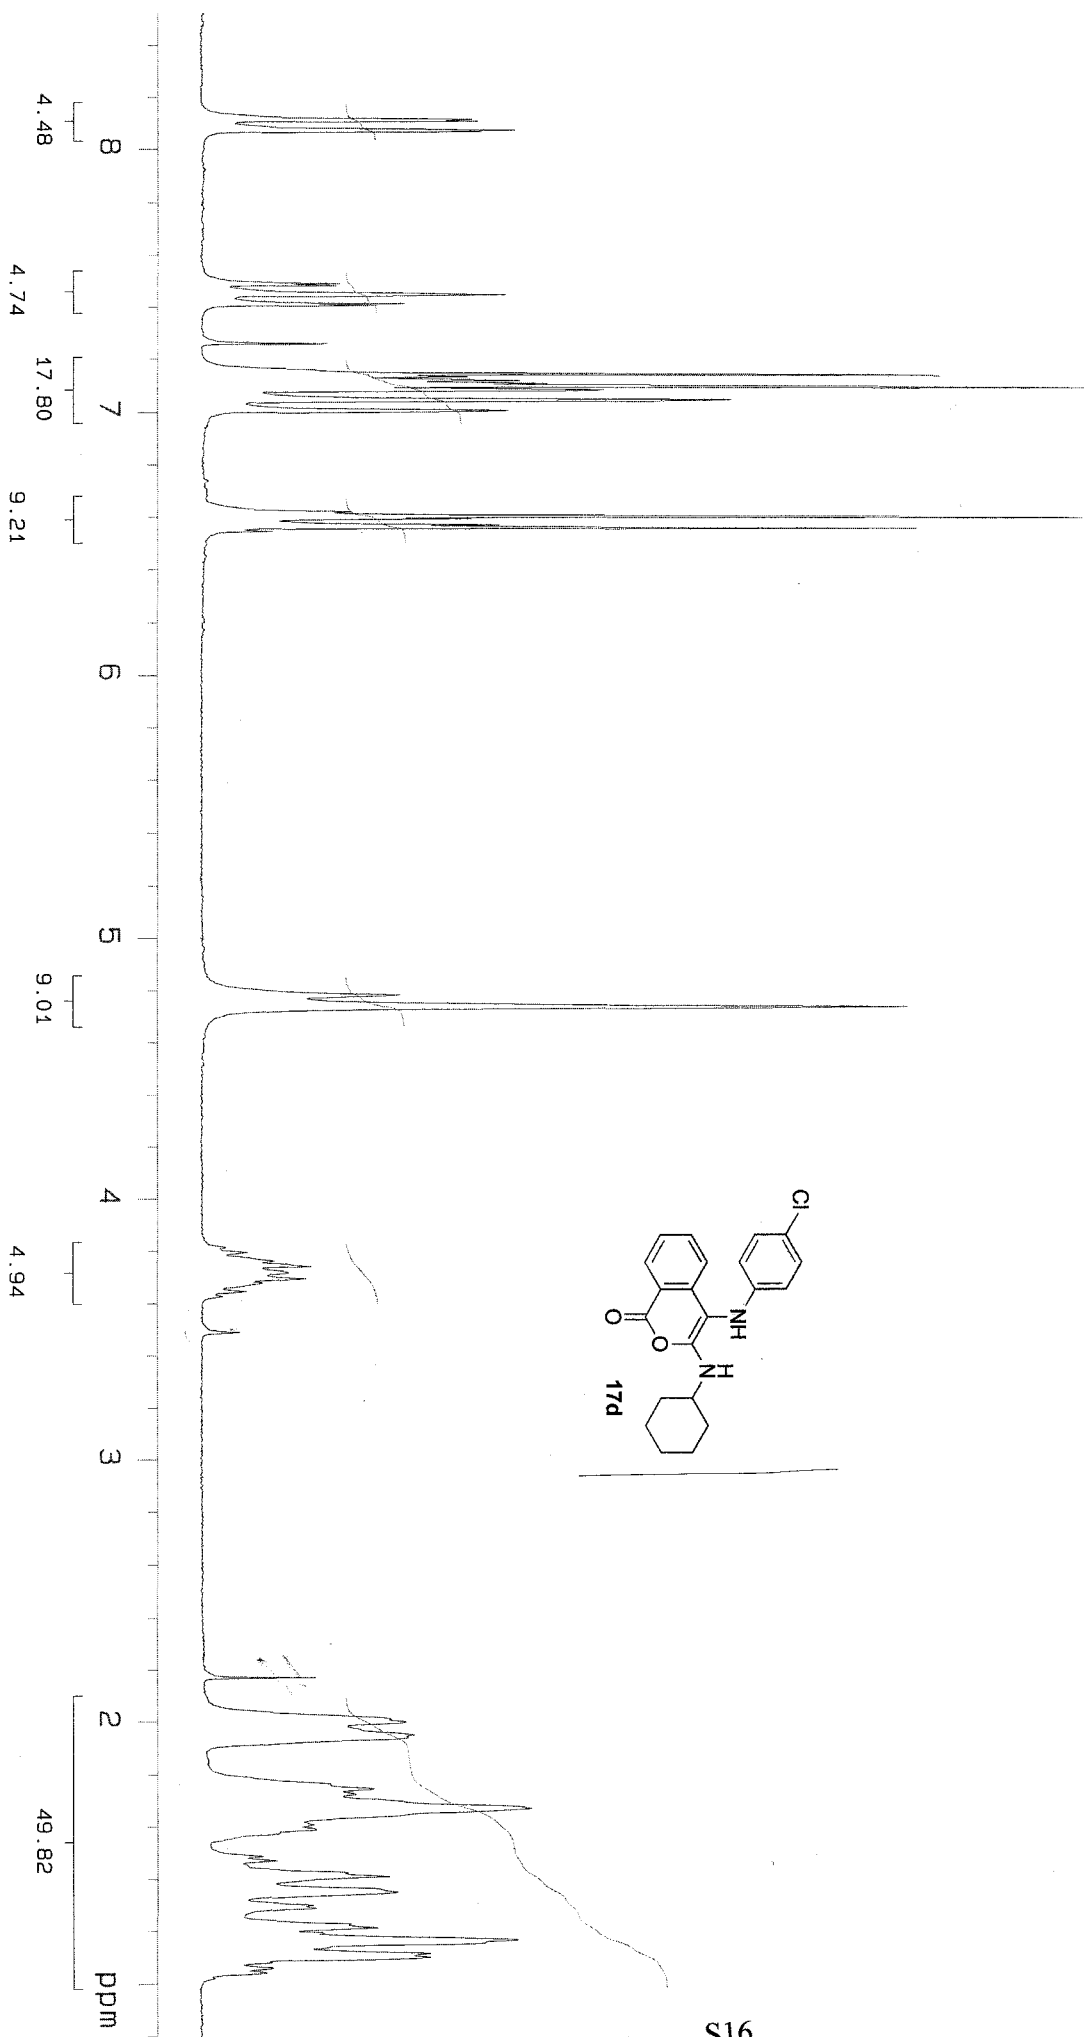

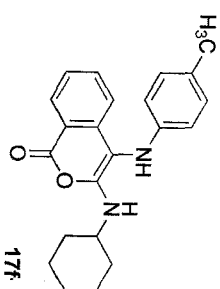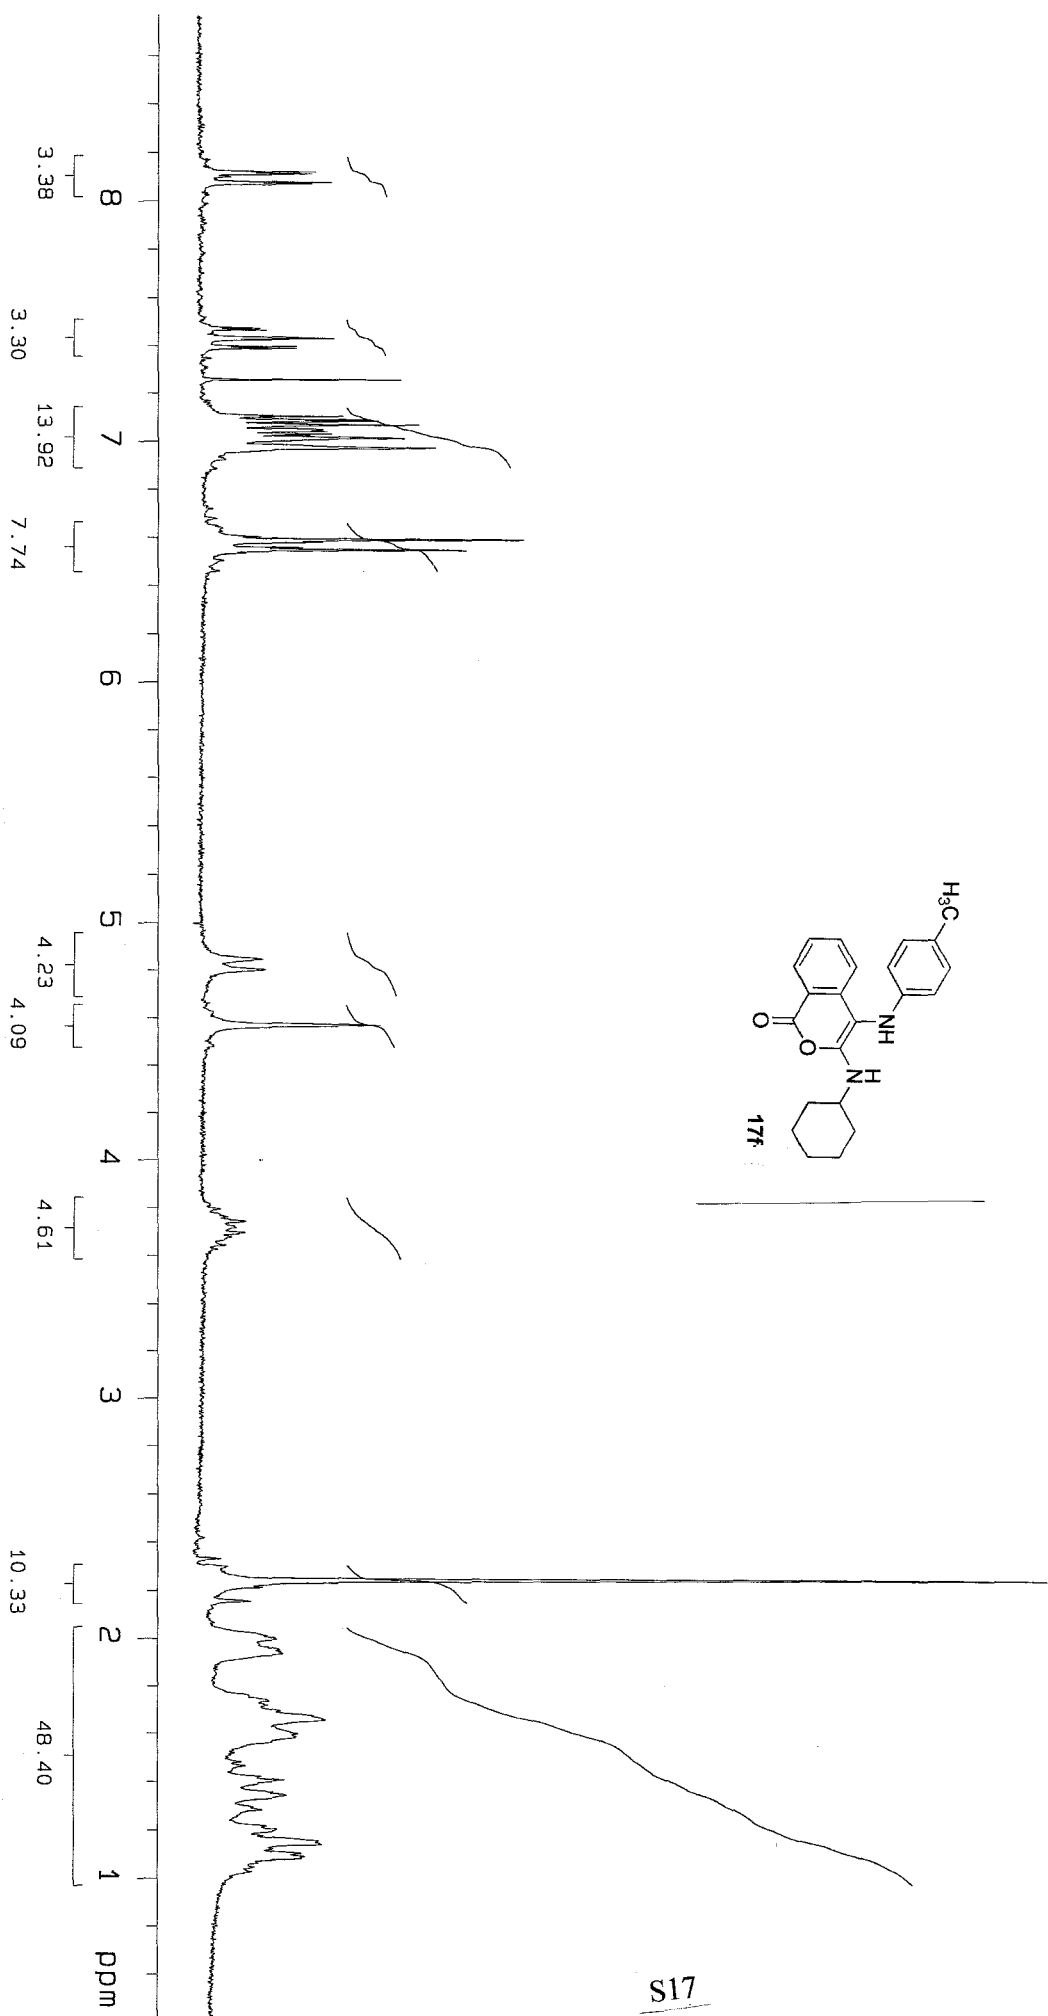

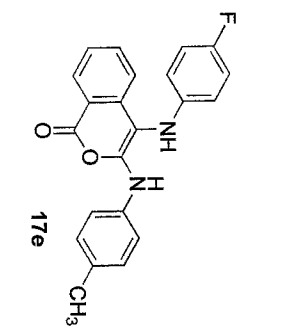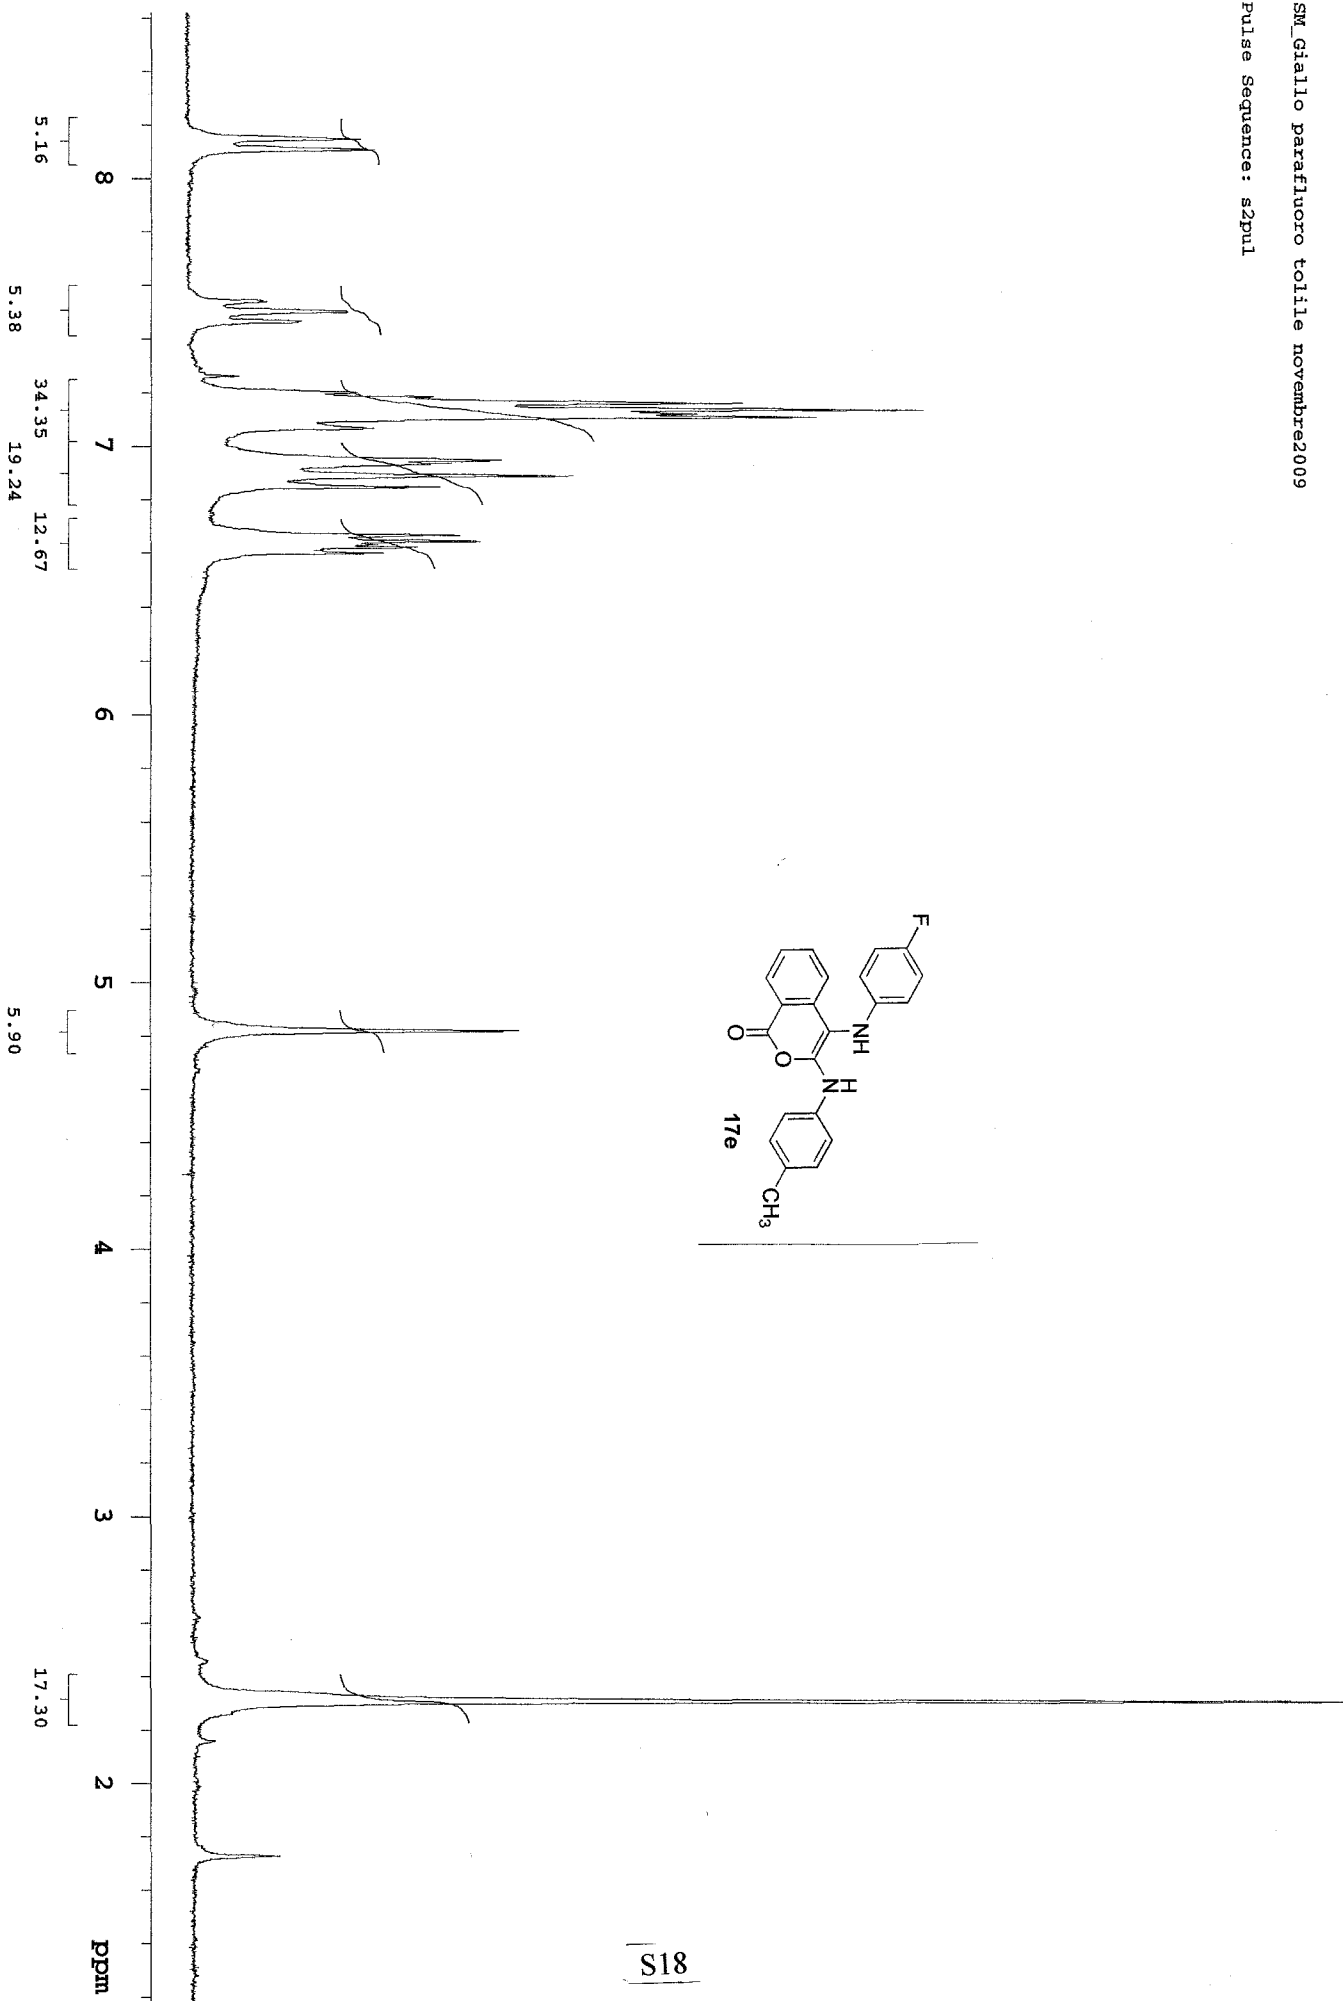

prodotto bianco

Pulse Sequence: s2pu1

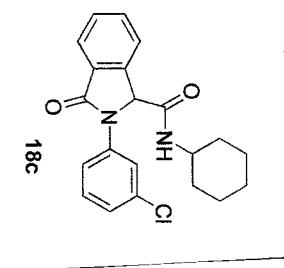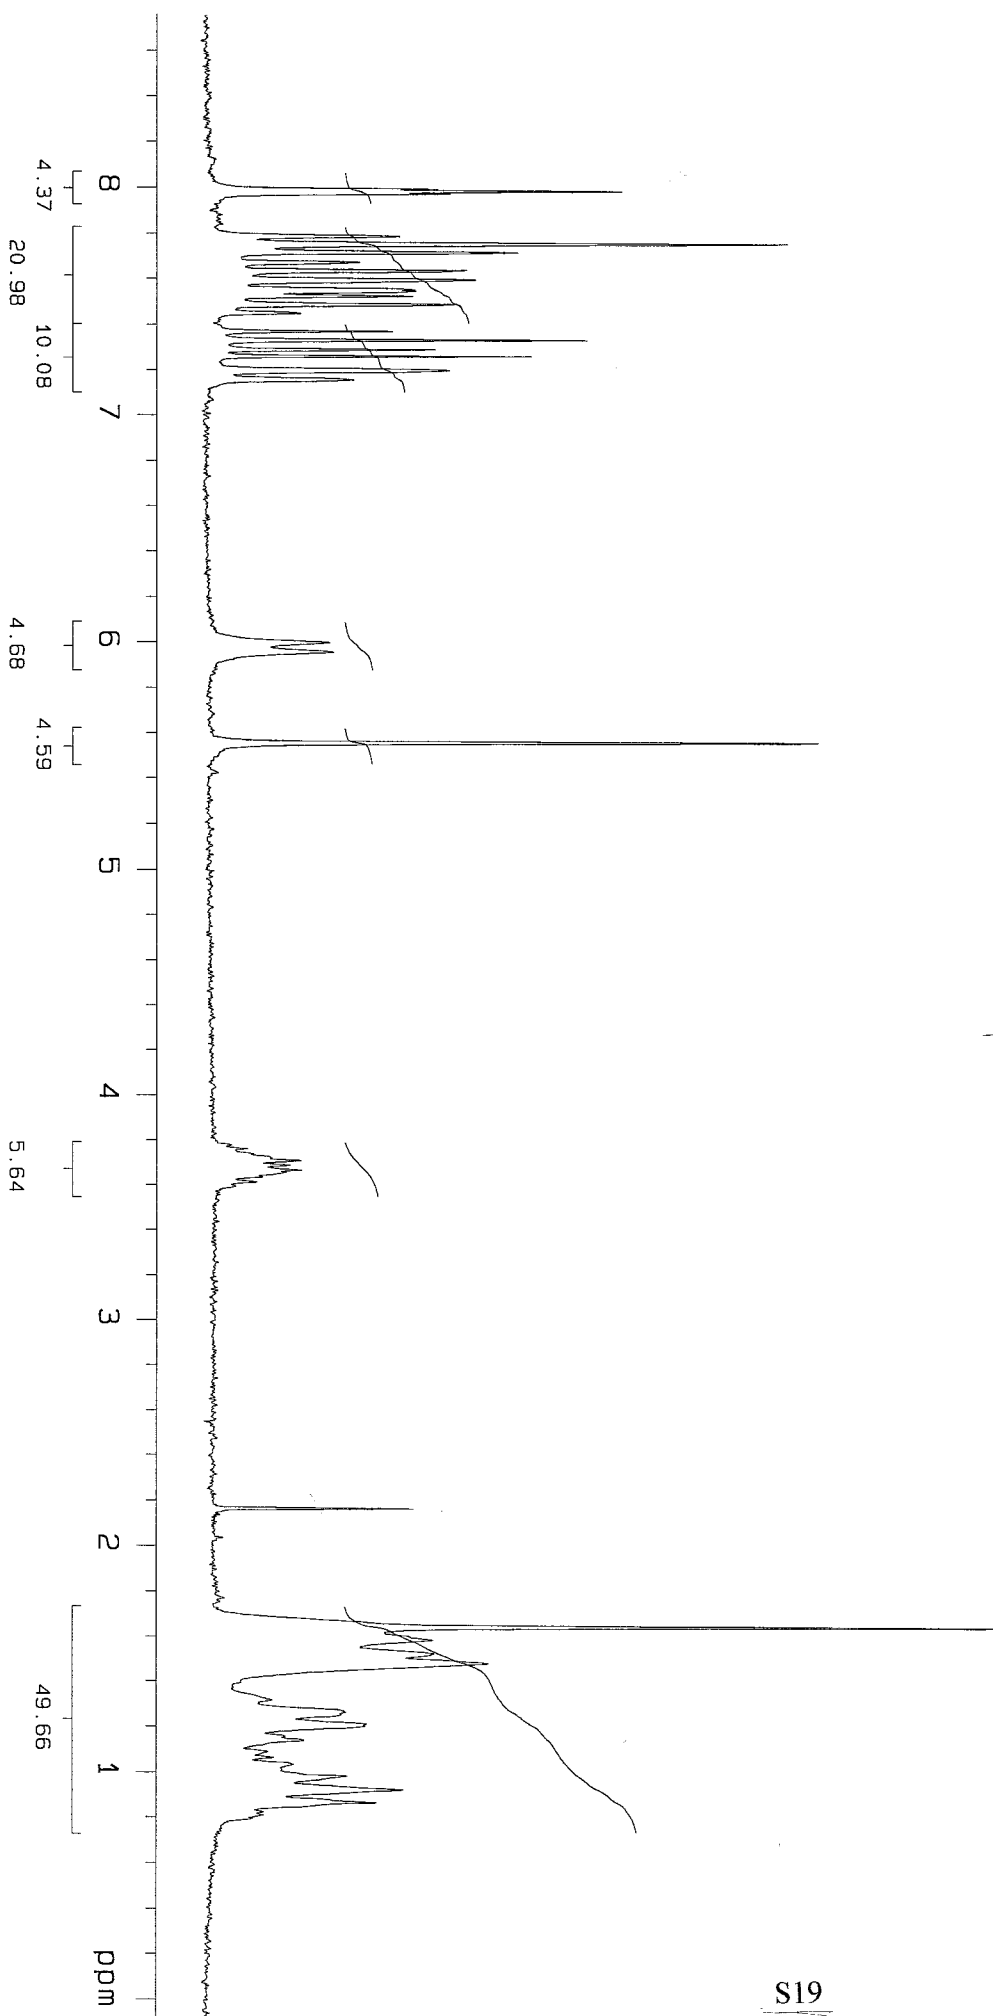

prodotto bianco con metile  
Pulse Sequence: s2pu1

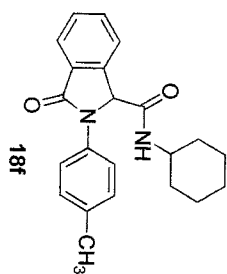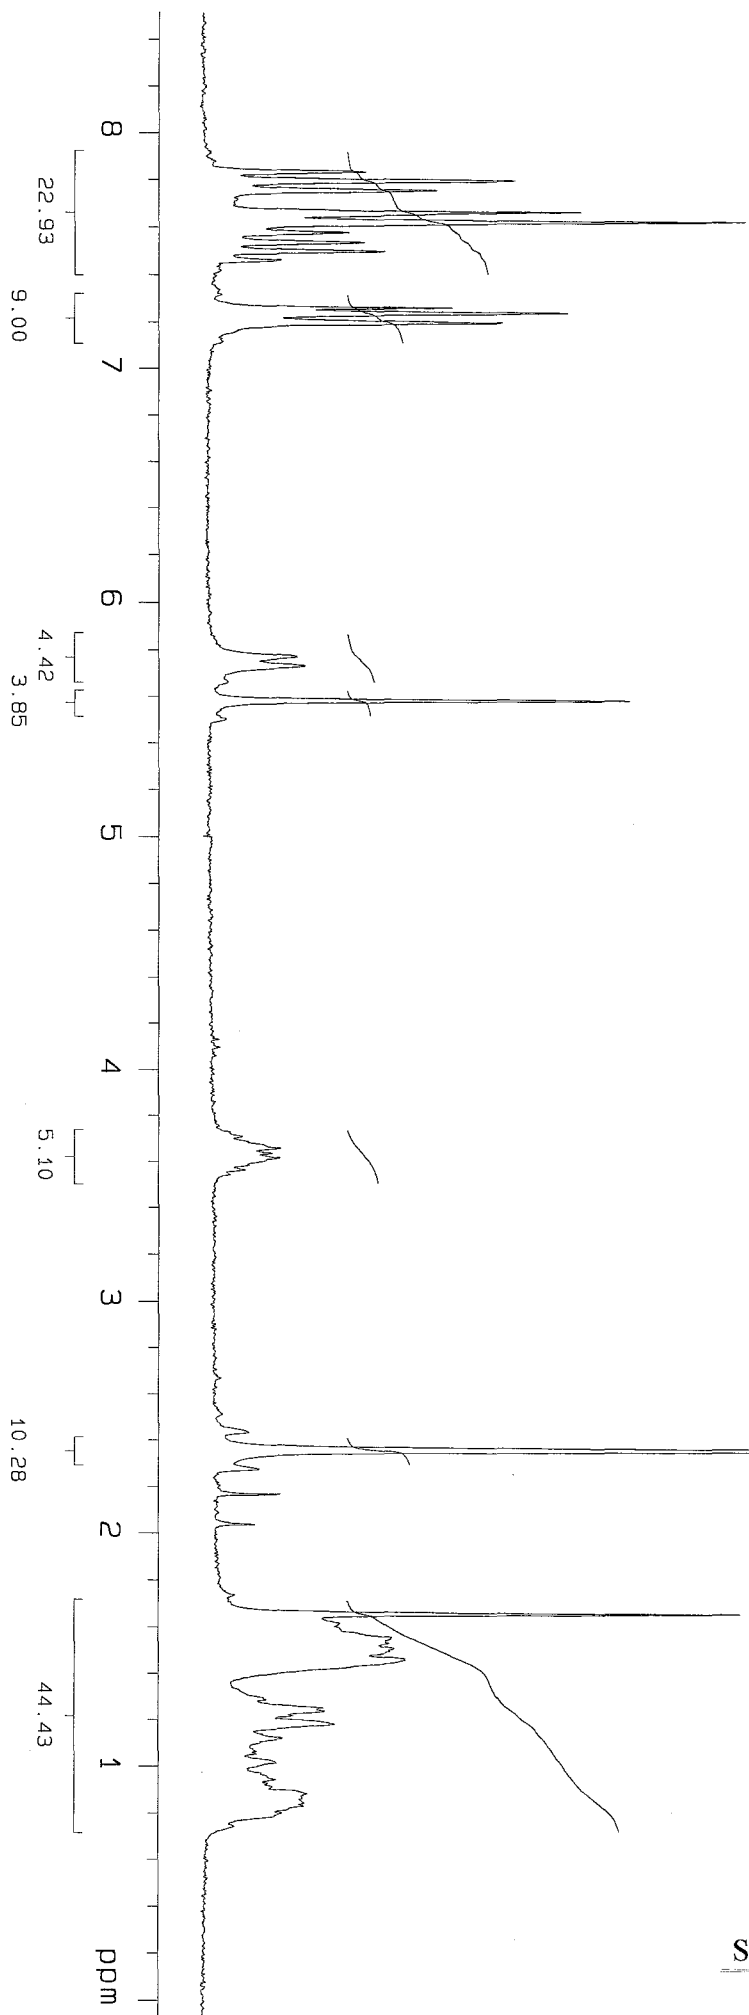

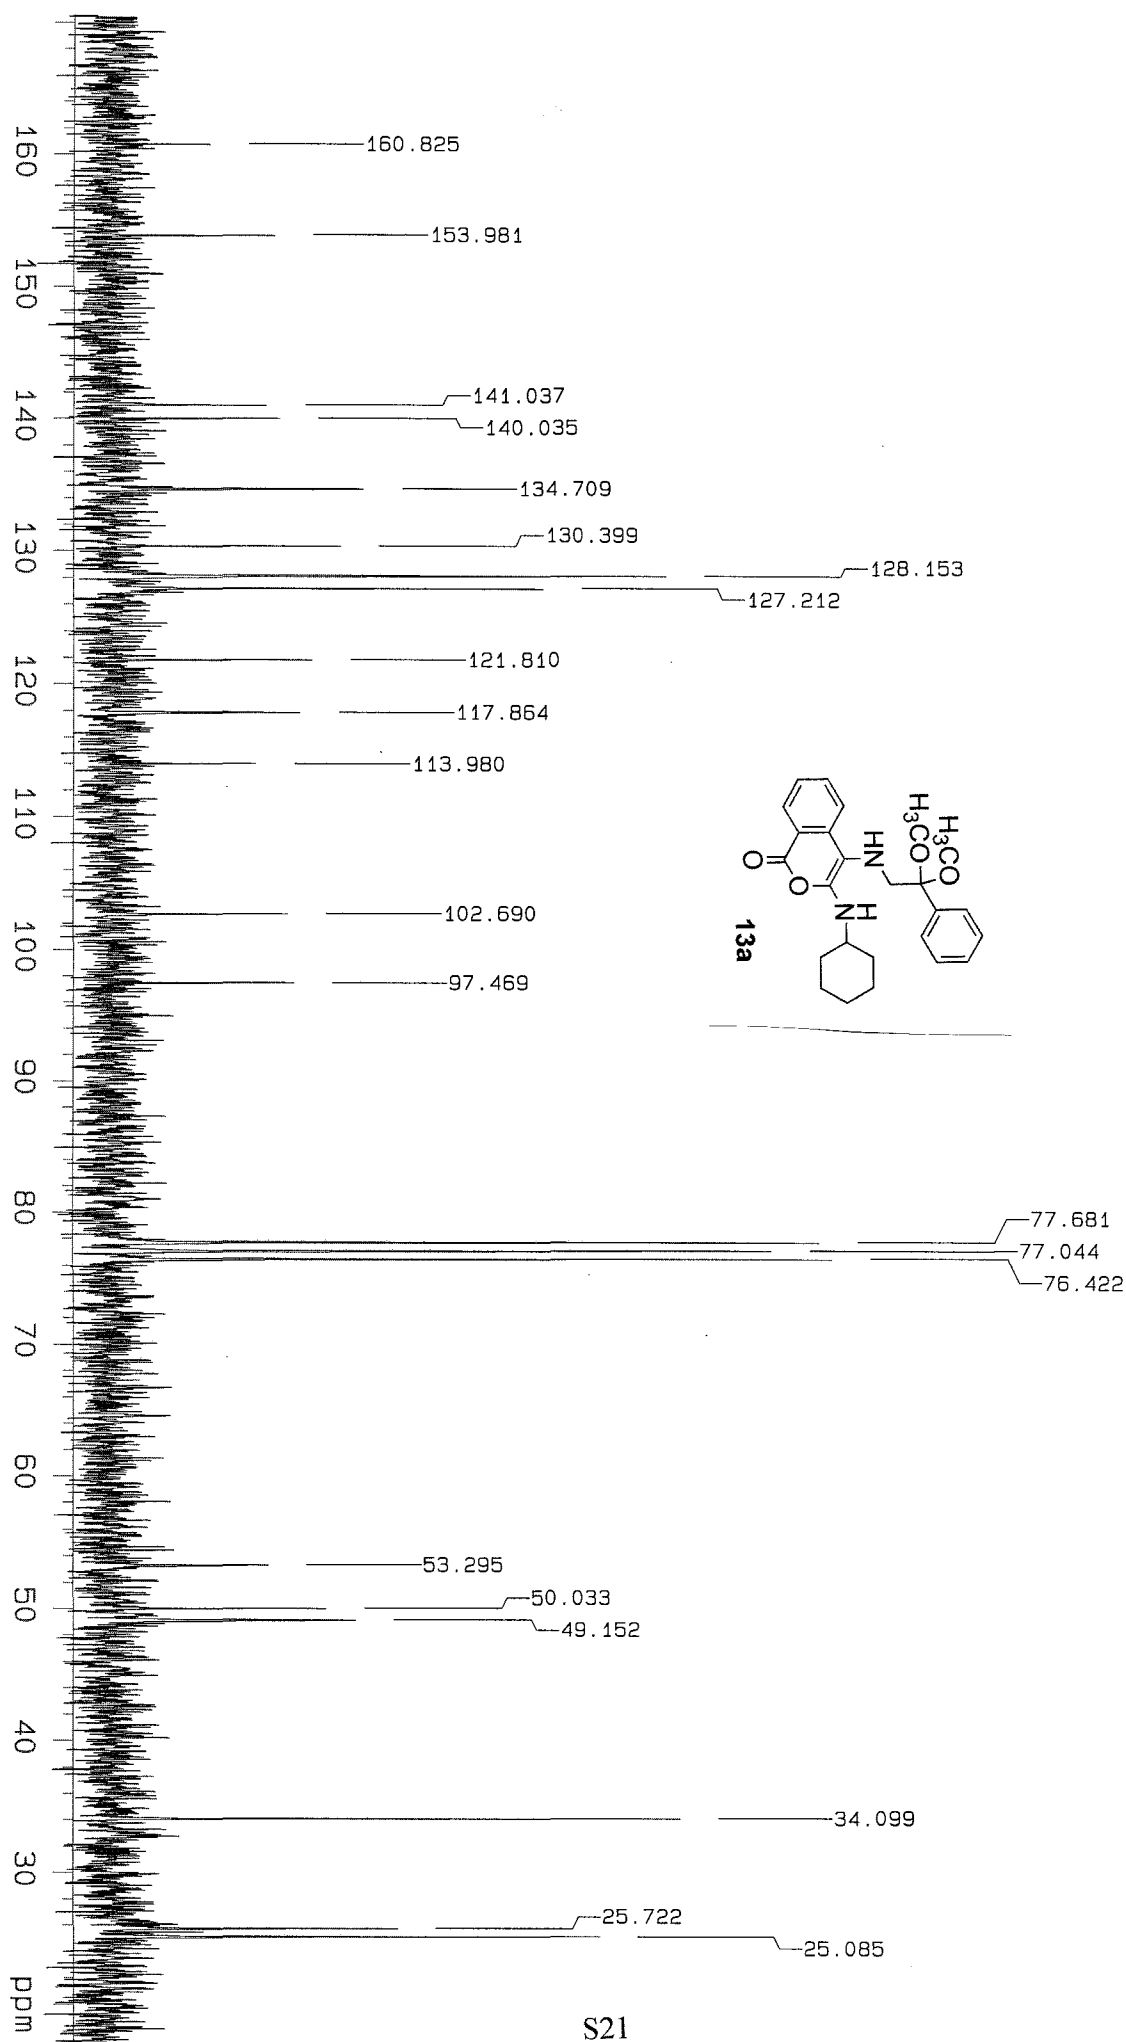

13C OBSERVE

Pulse Sequence: s2pu1

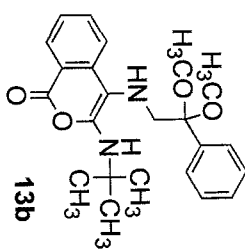

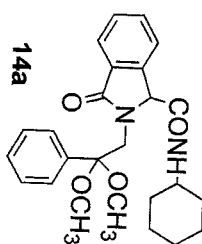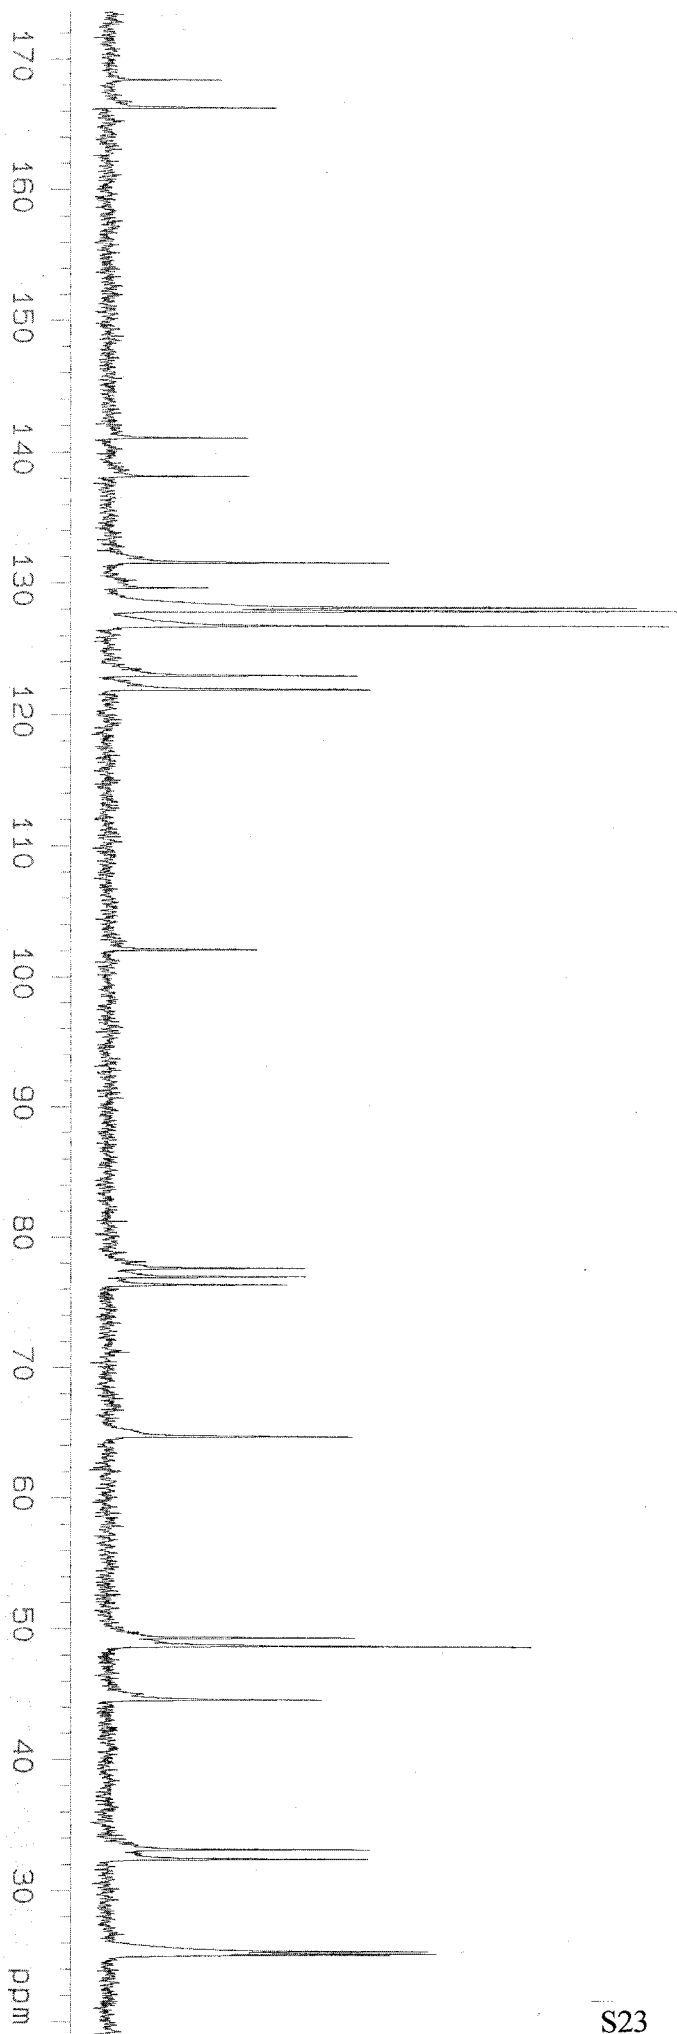

Pulse Sequence: s2p1

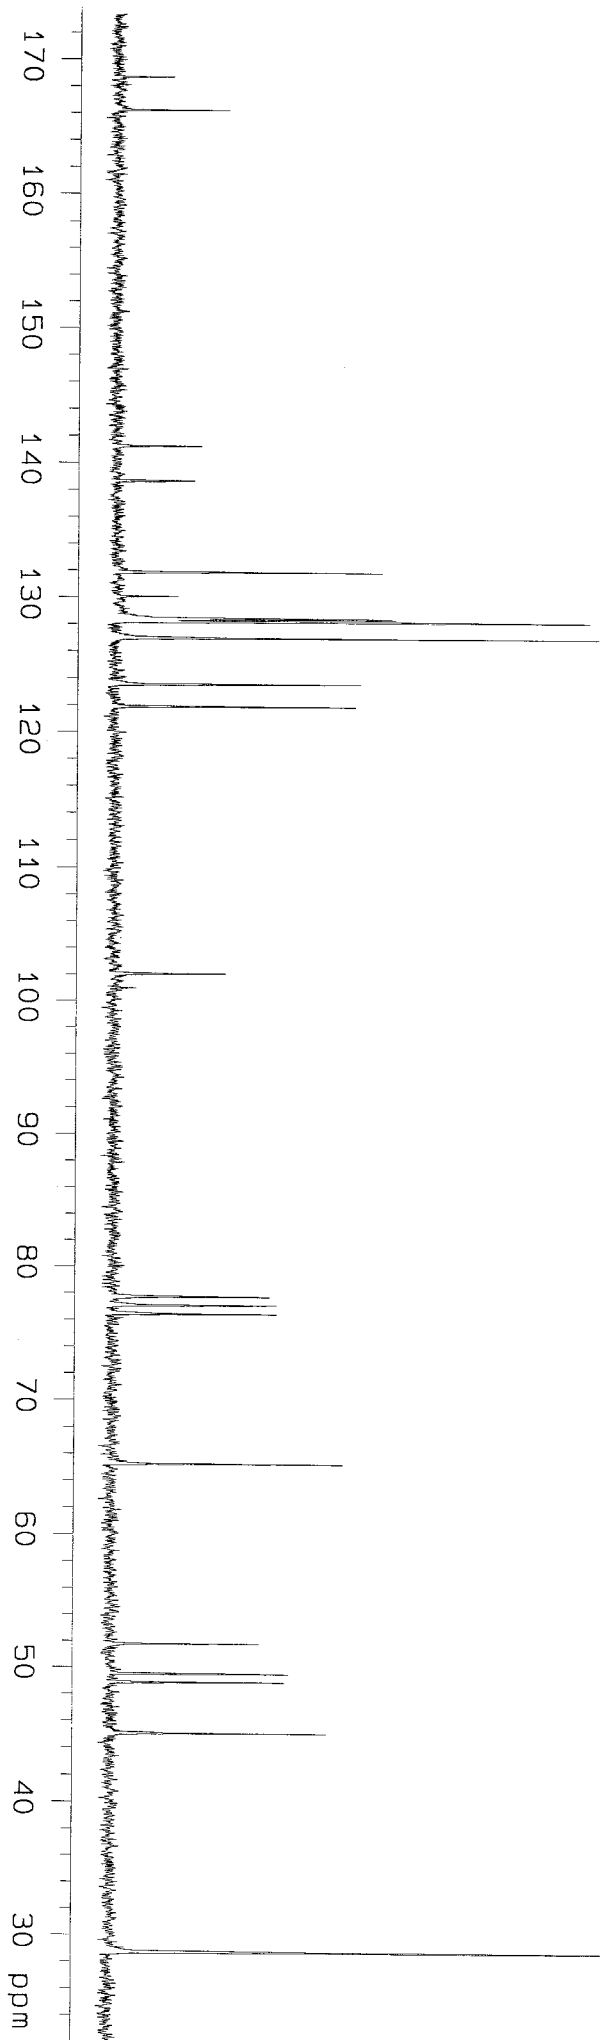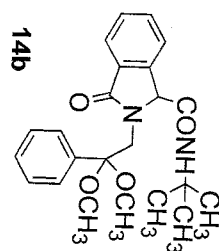

180  
160  
140  
120  
100  
80  
60  
40  
ppm

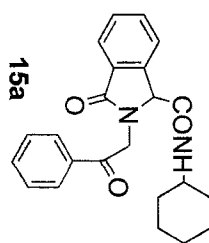

SM\_tert\_butyle deprotected  
Pulse Sequence: s2pu1

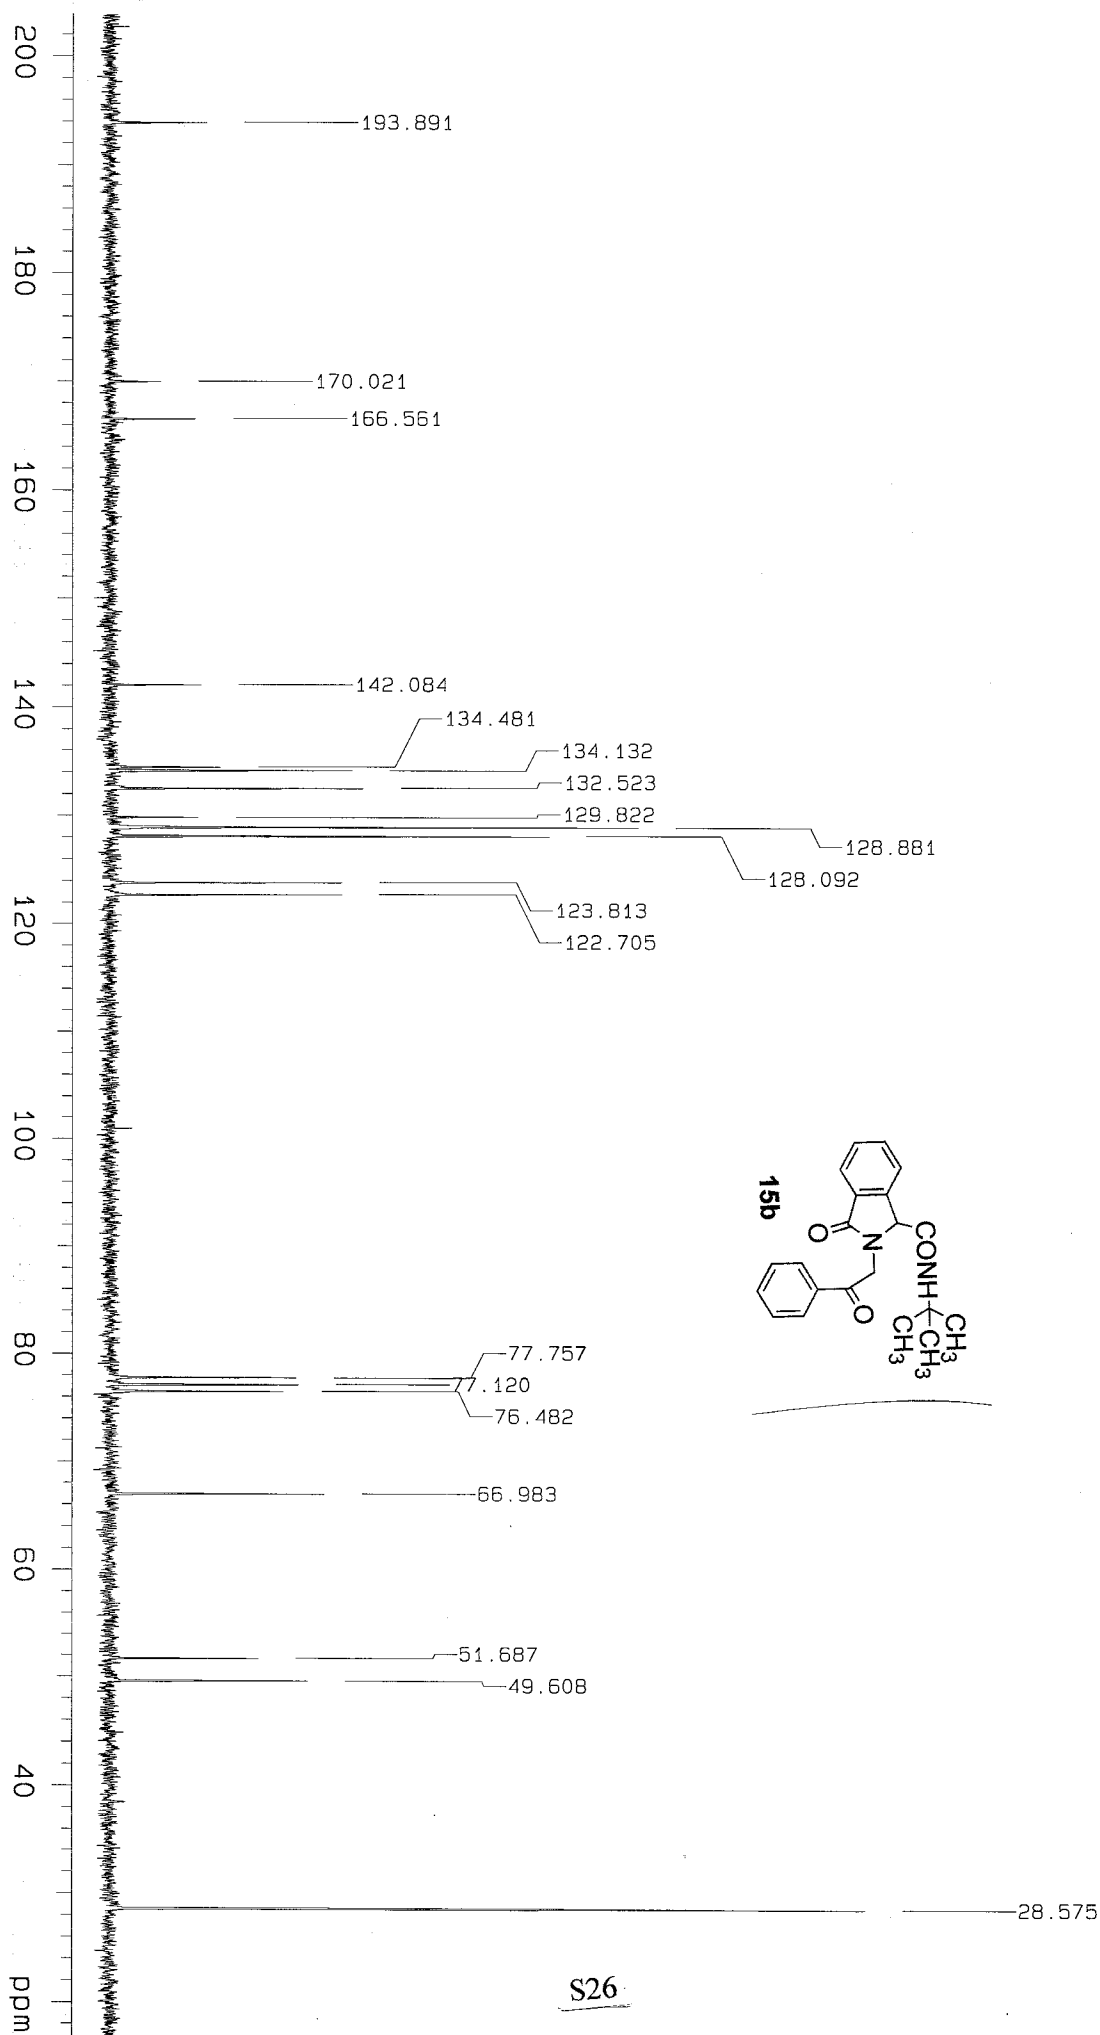

13C OBSERVE

Pulse Sequence: s2pu1

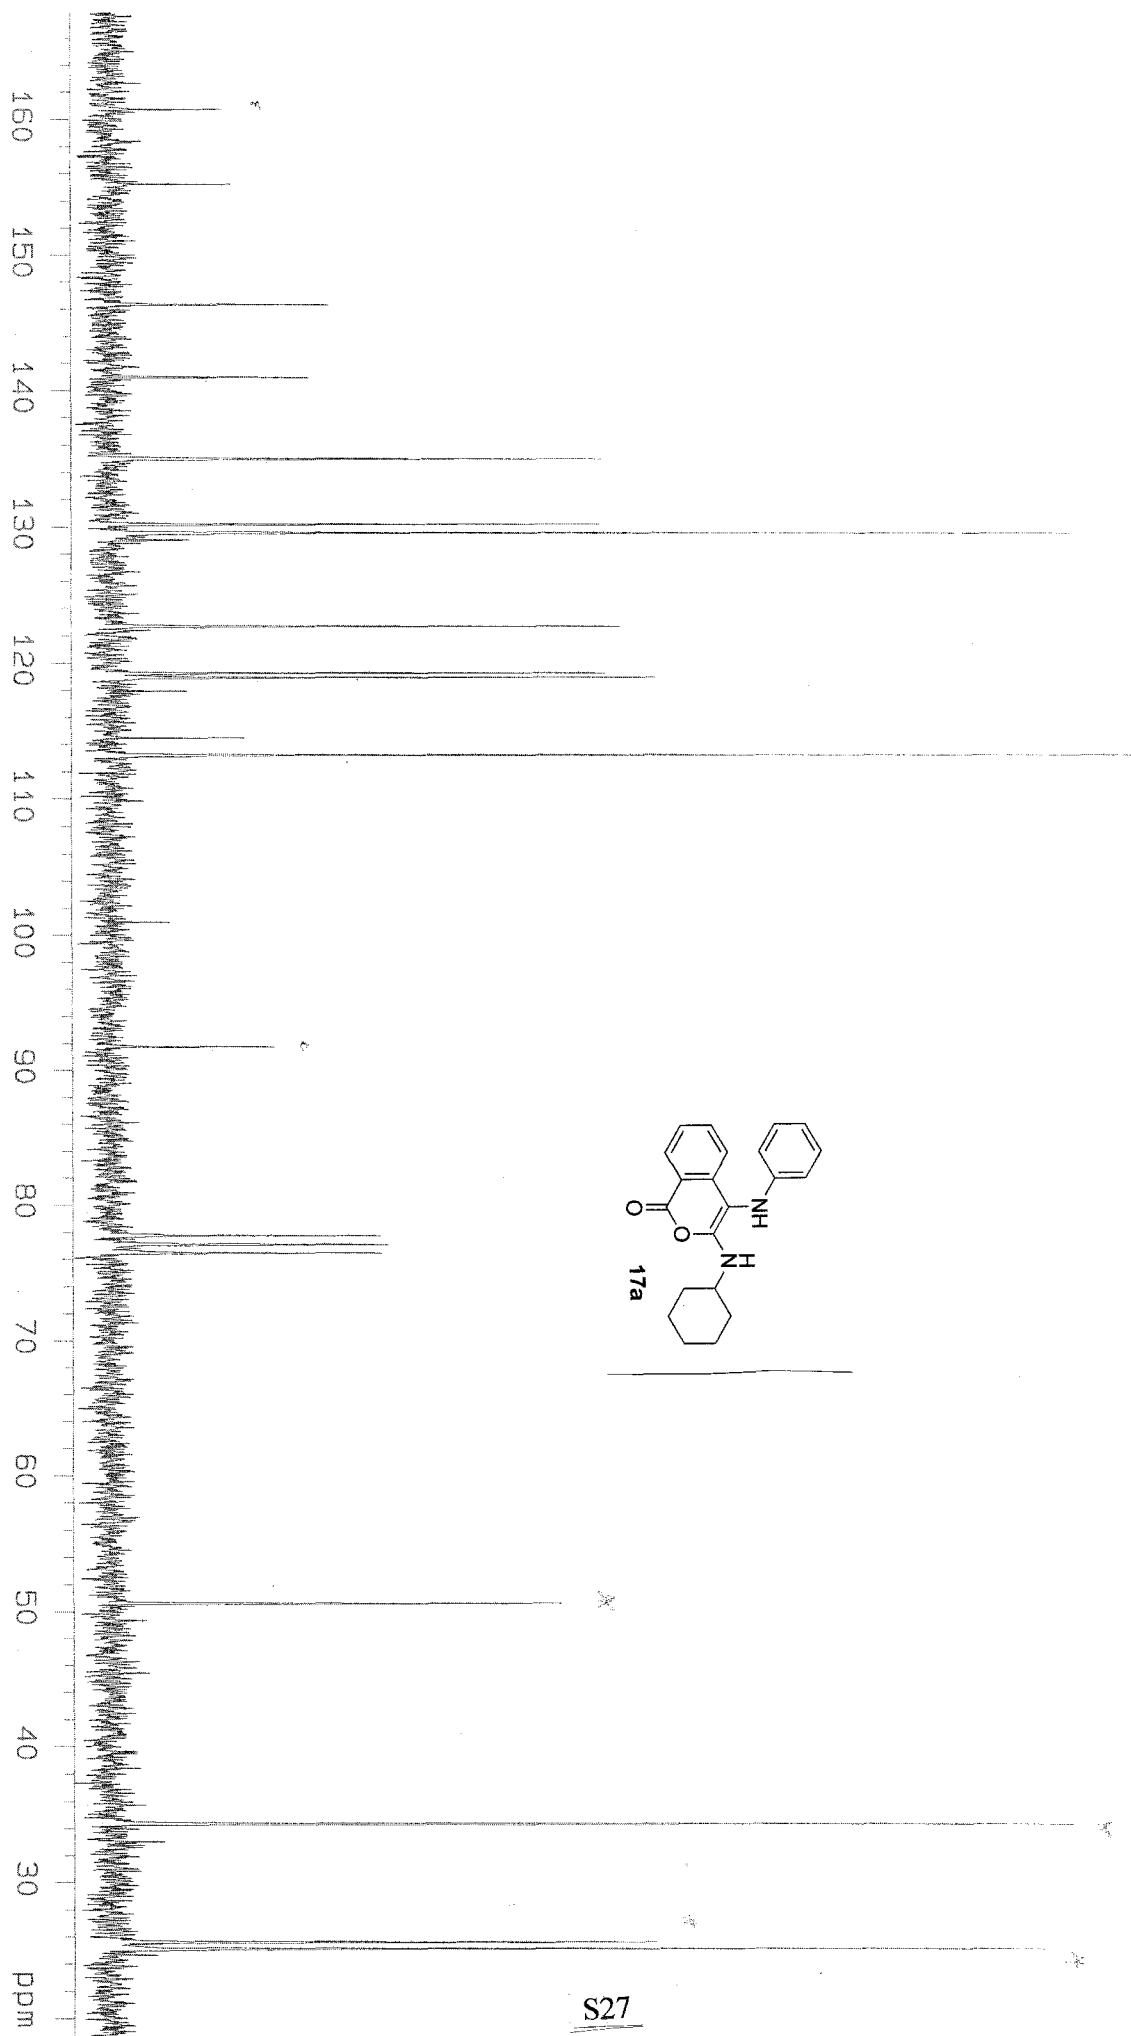

13C OBSERVE  
Pulse Sequence: s2pul

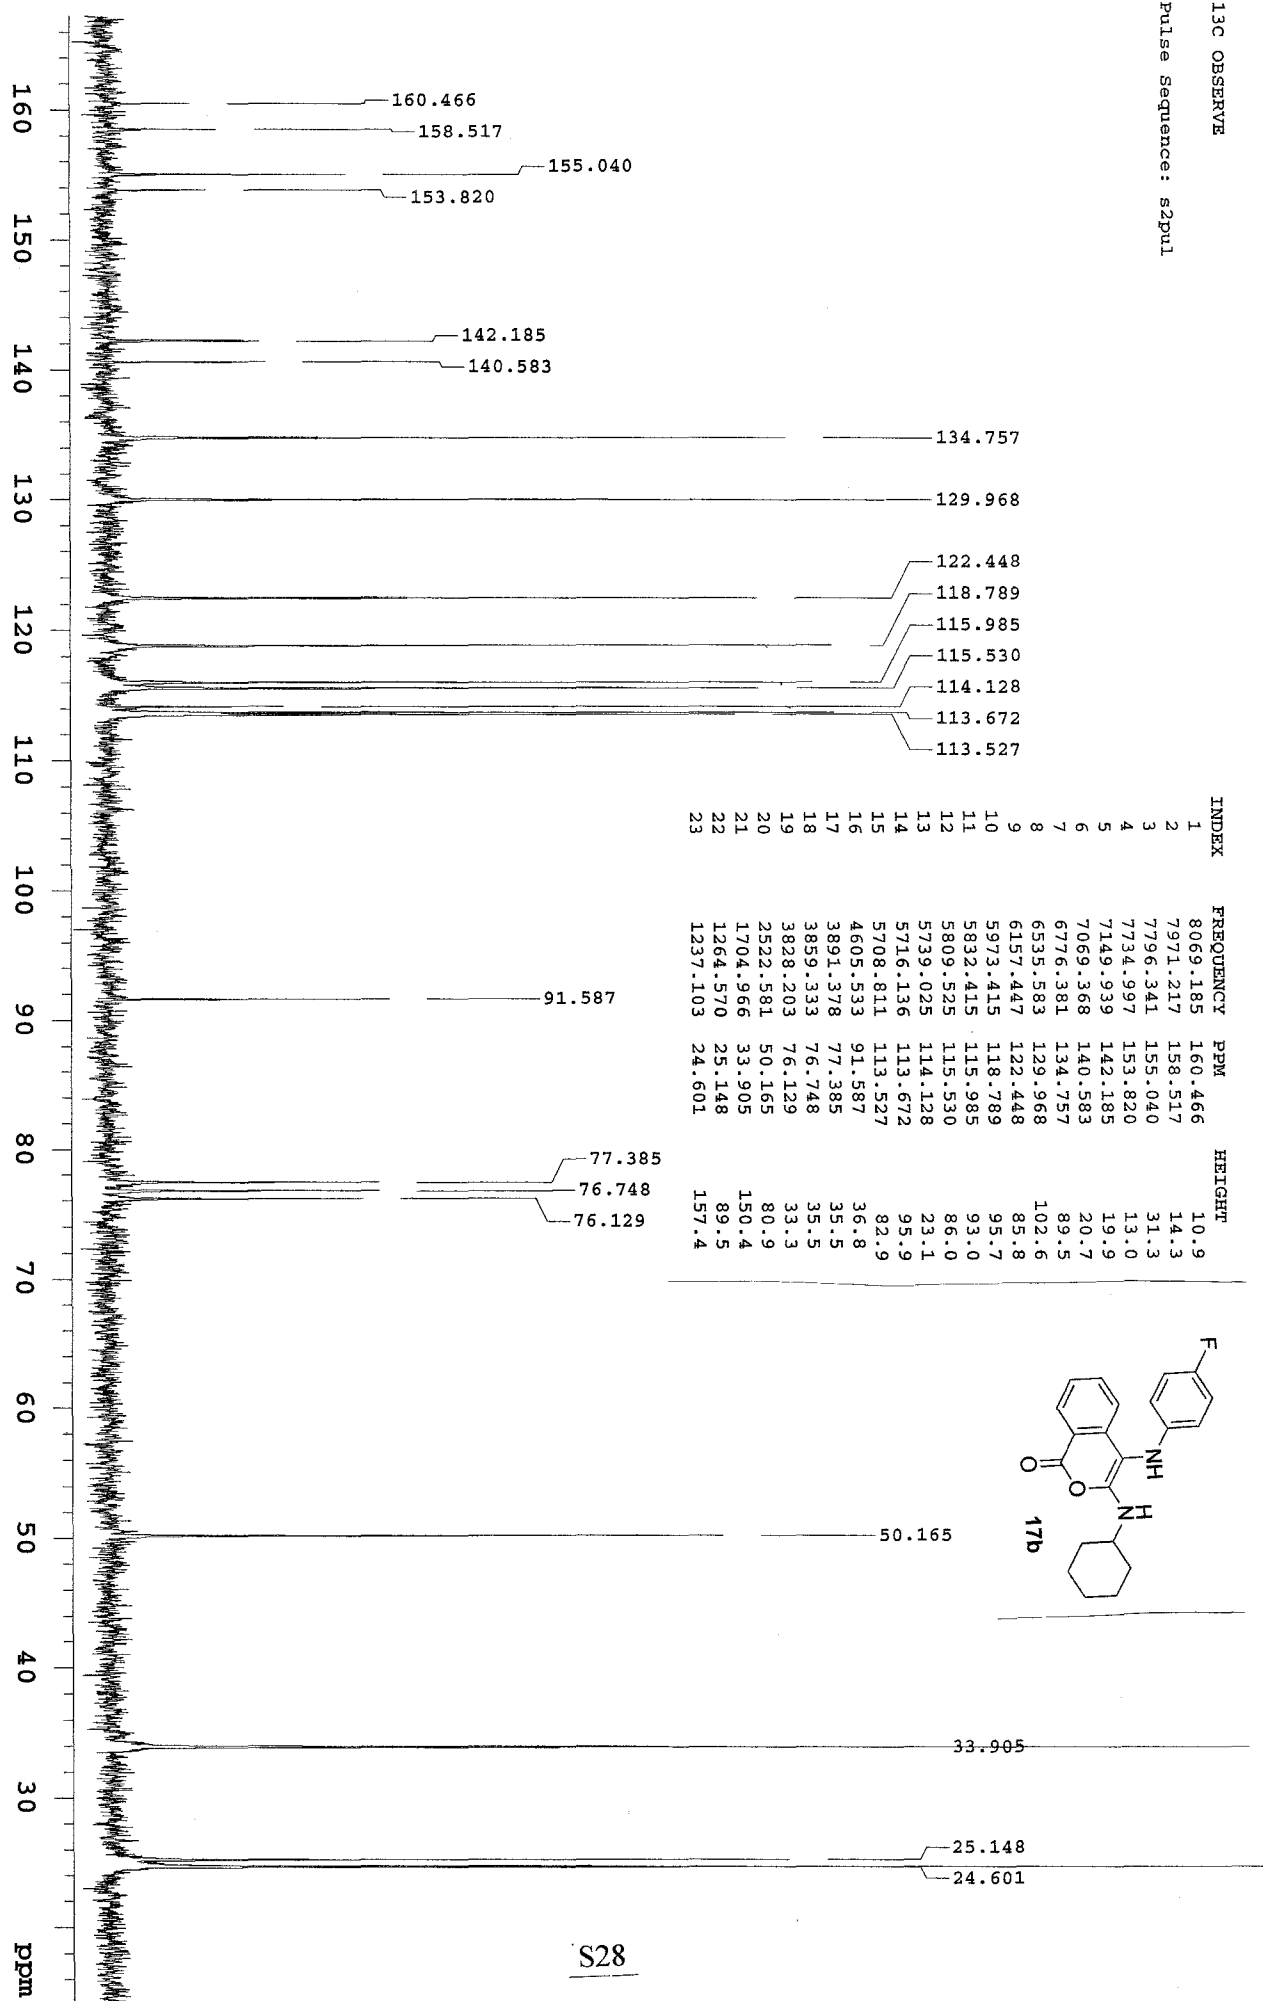

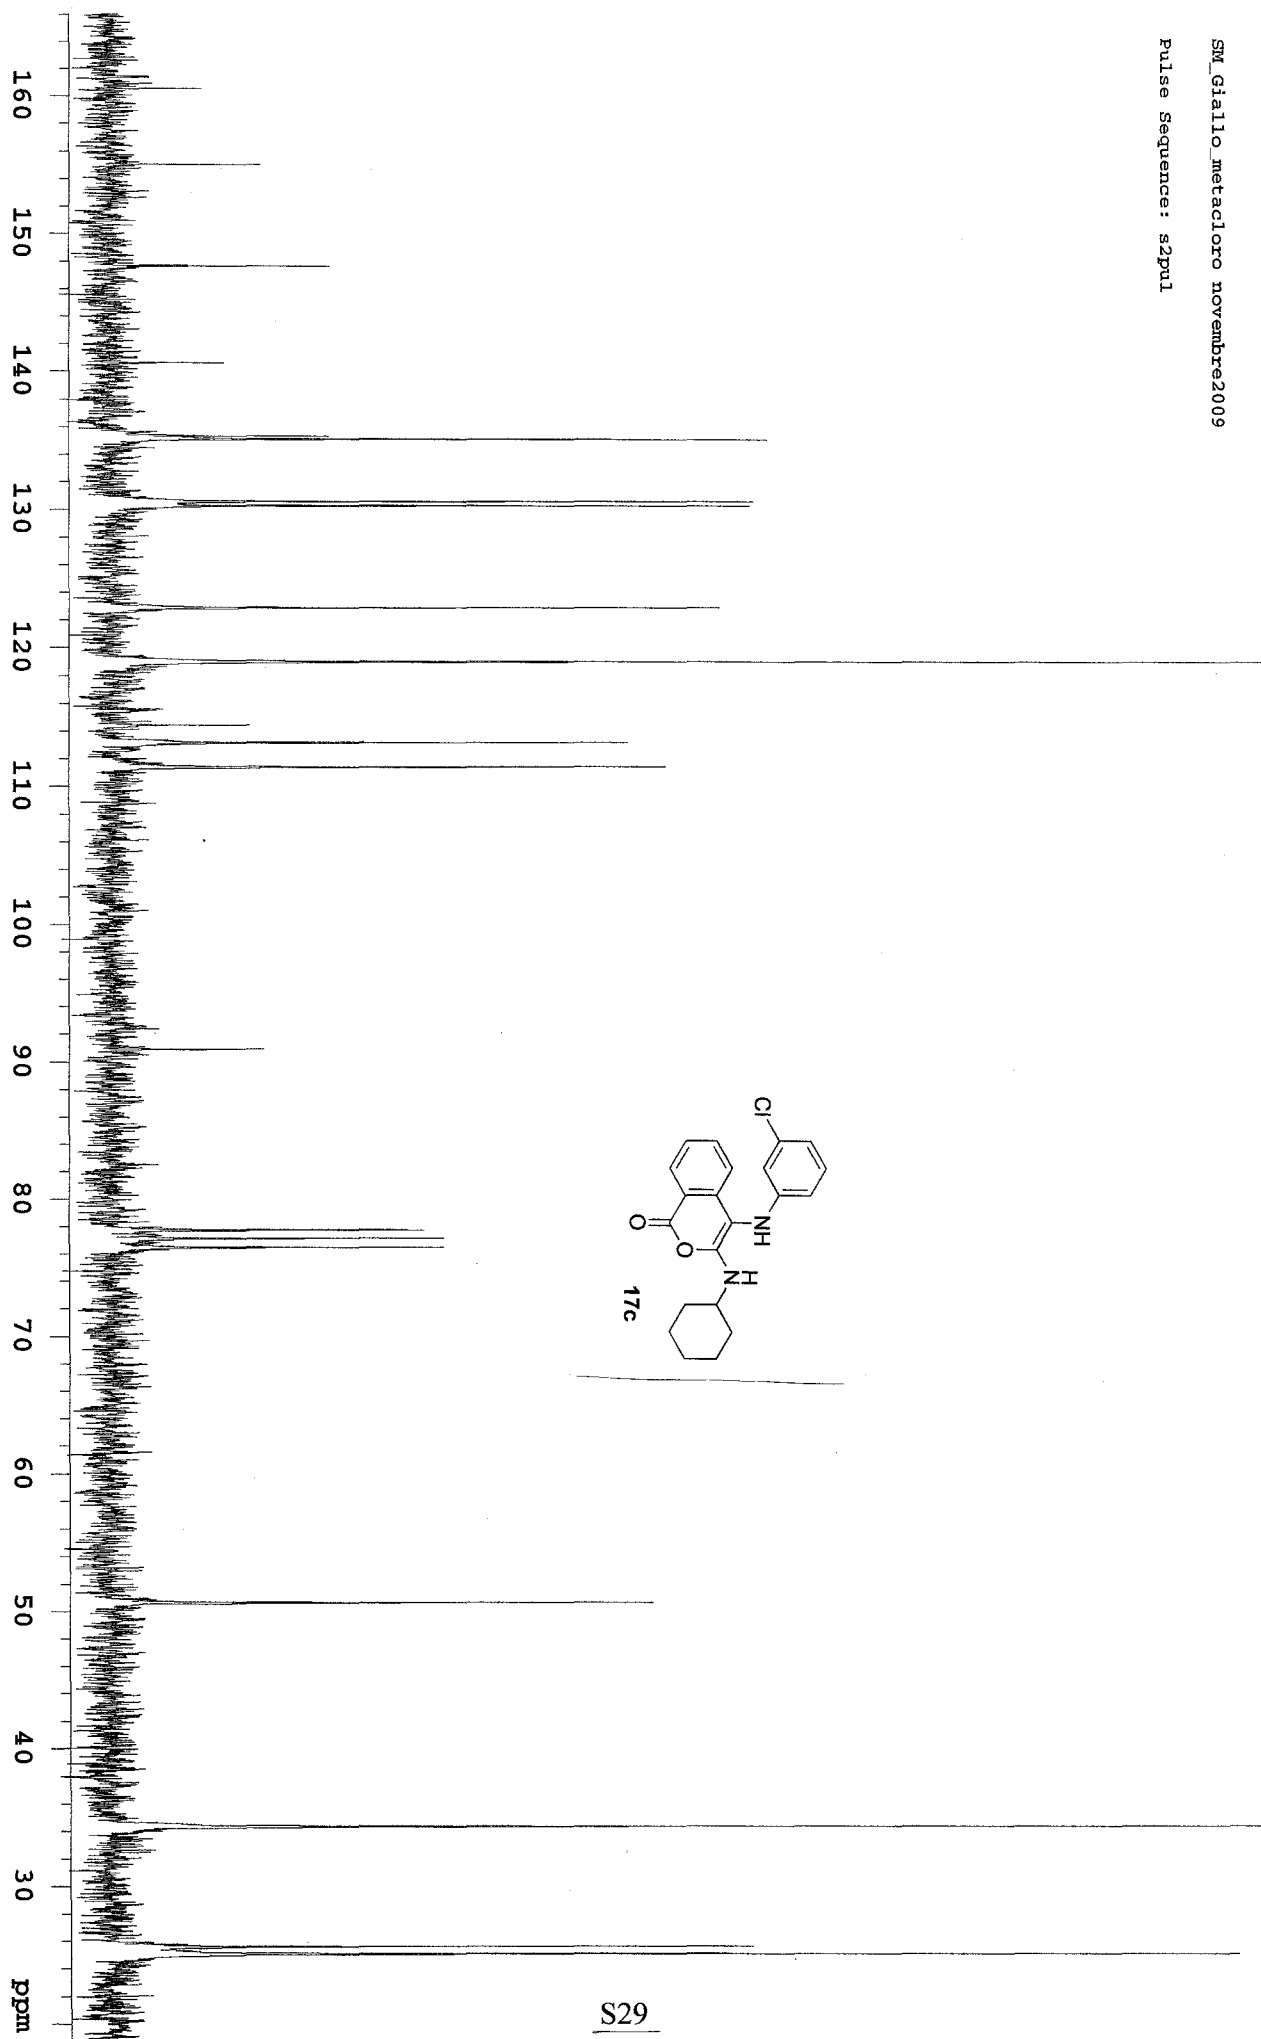

paraclopro derivato settembre 2009 C13

Pulse Sequence: s2pu1

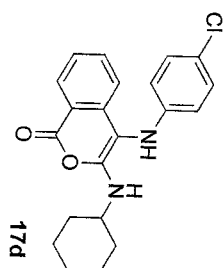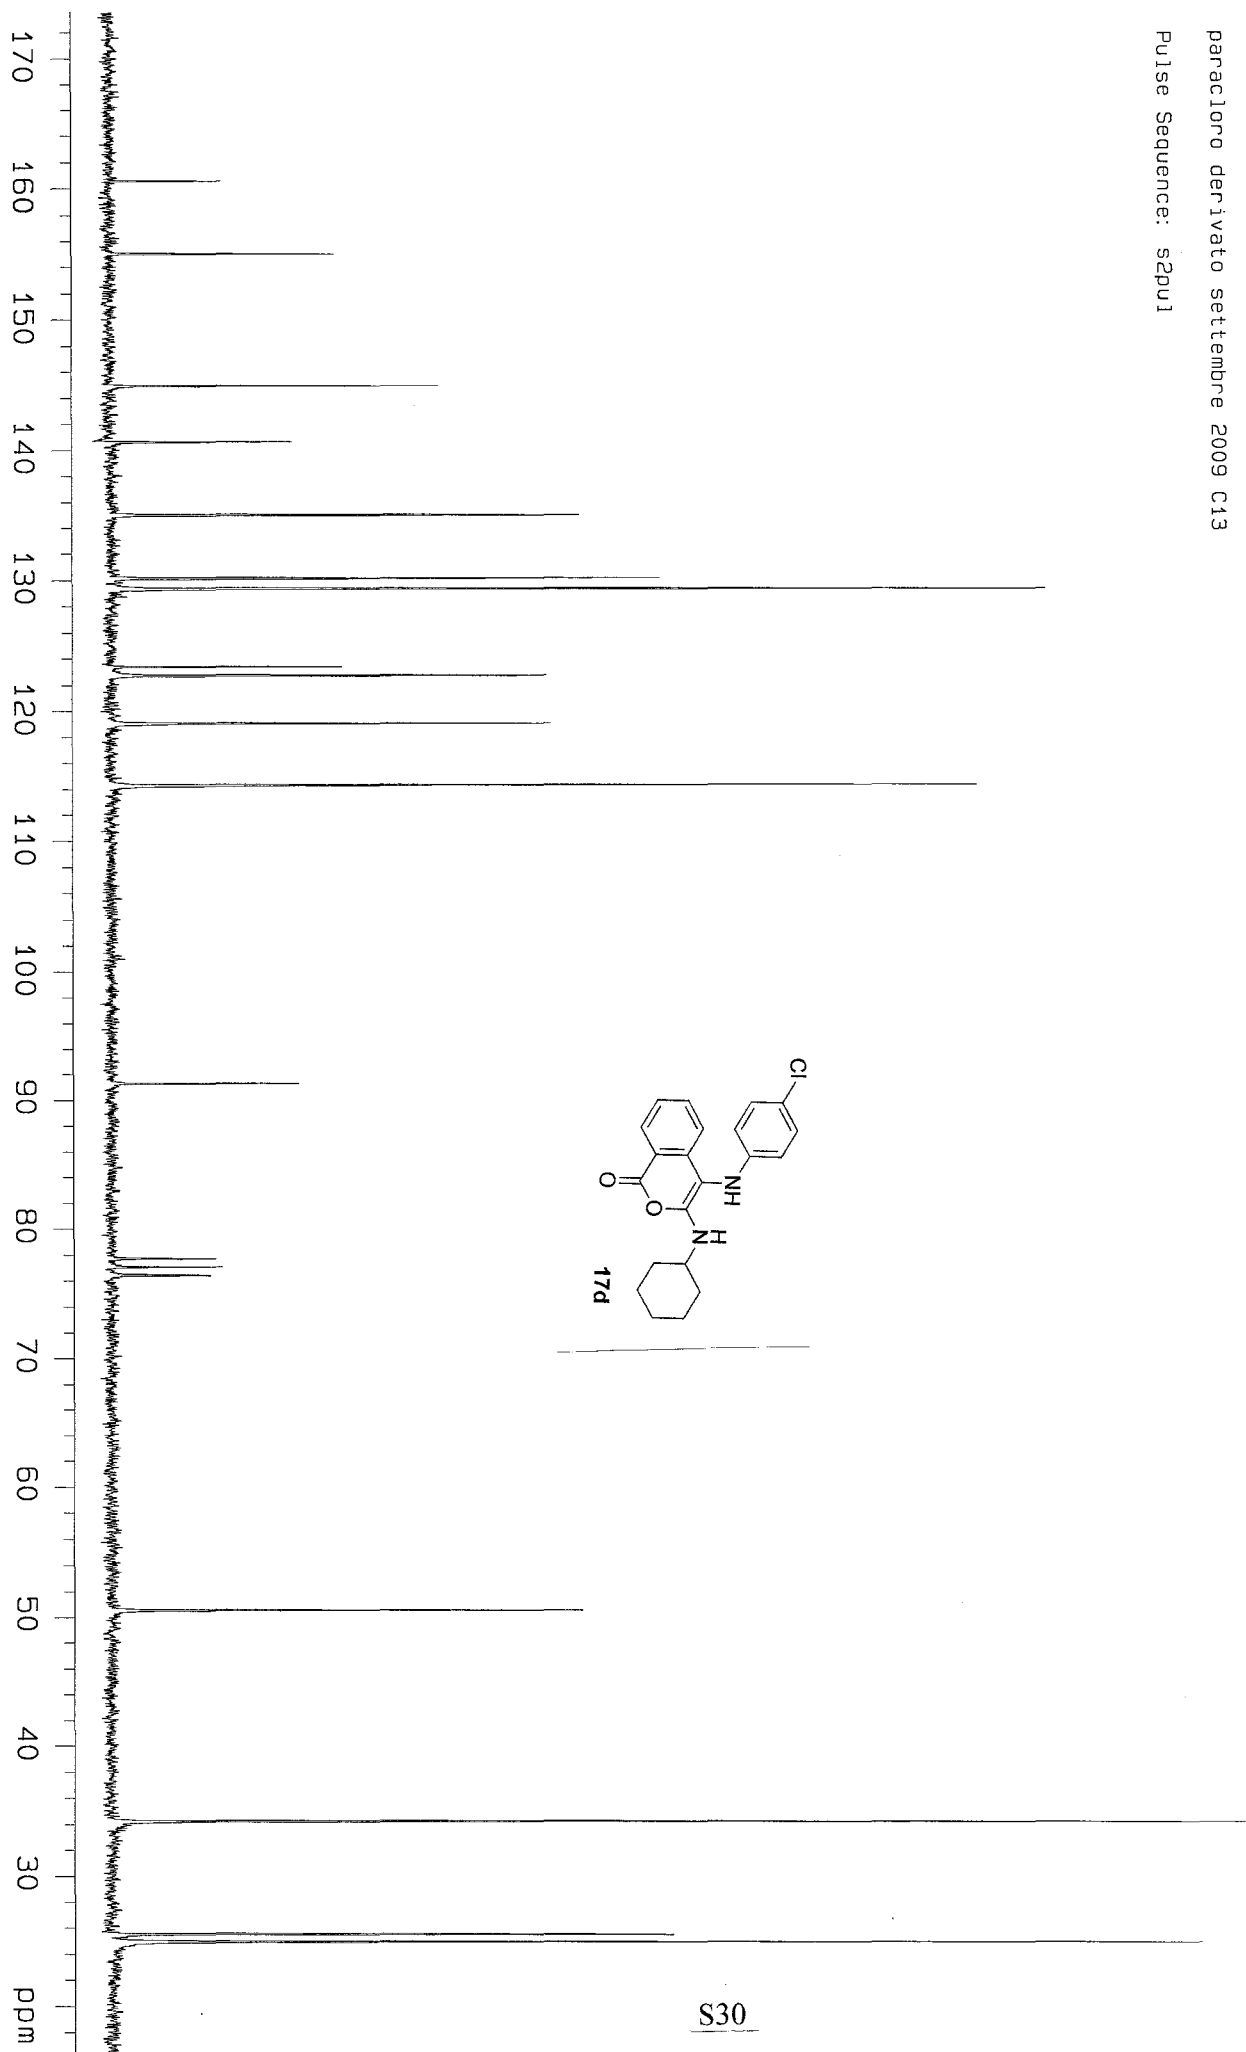

Pulse Sequence: szpul

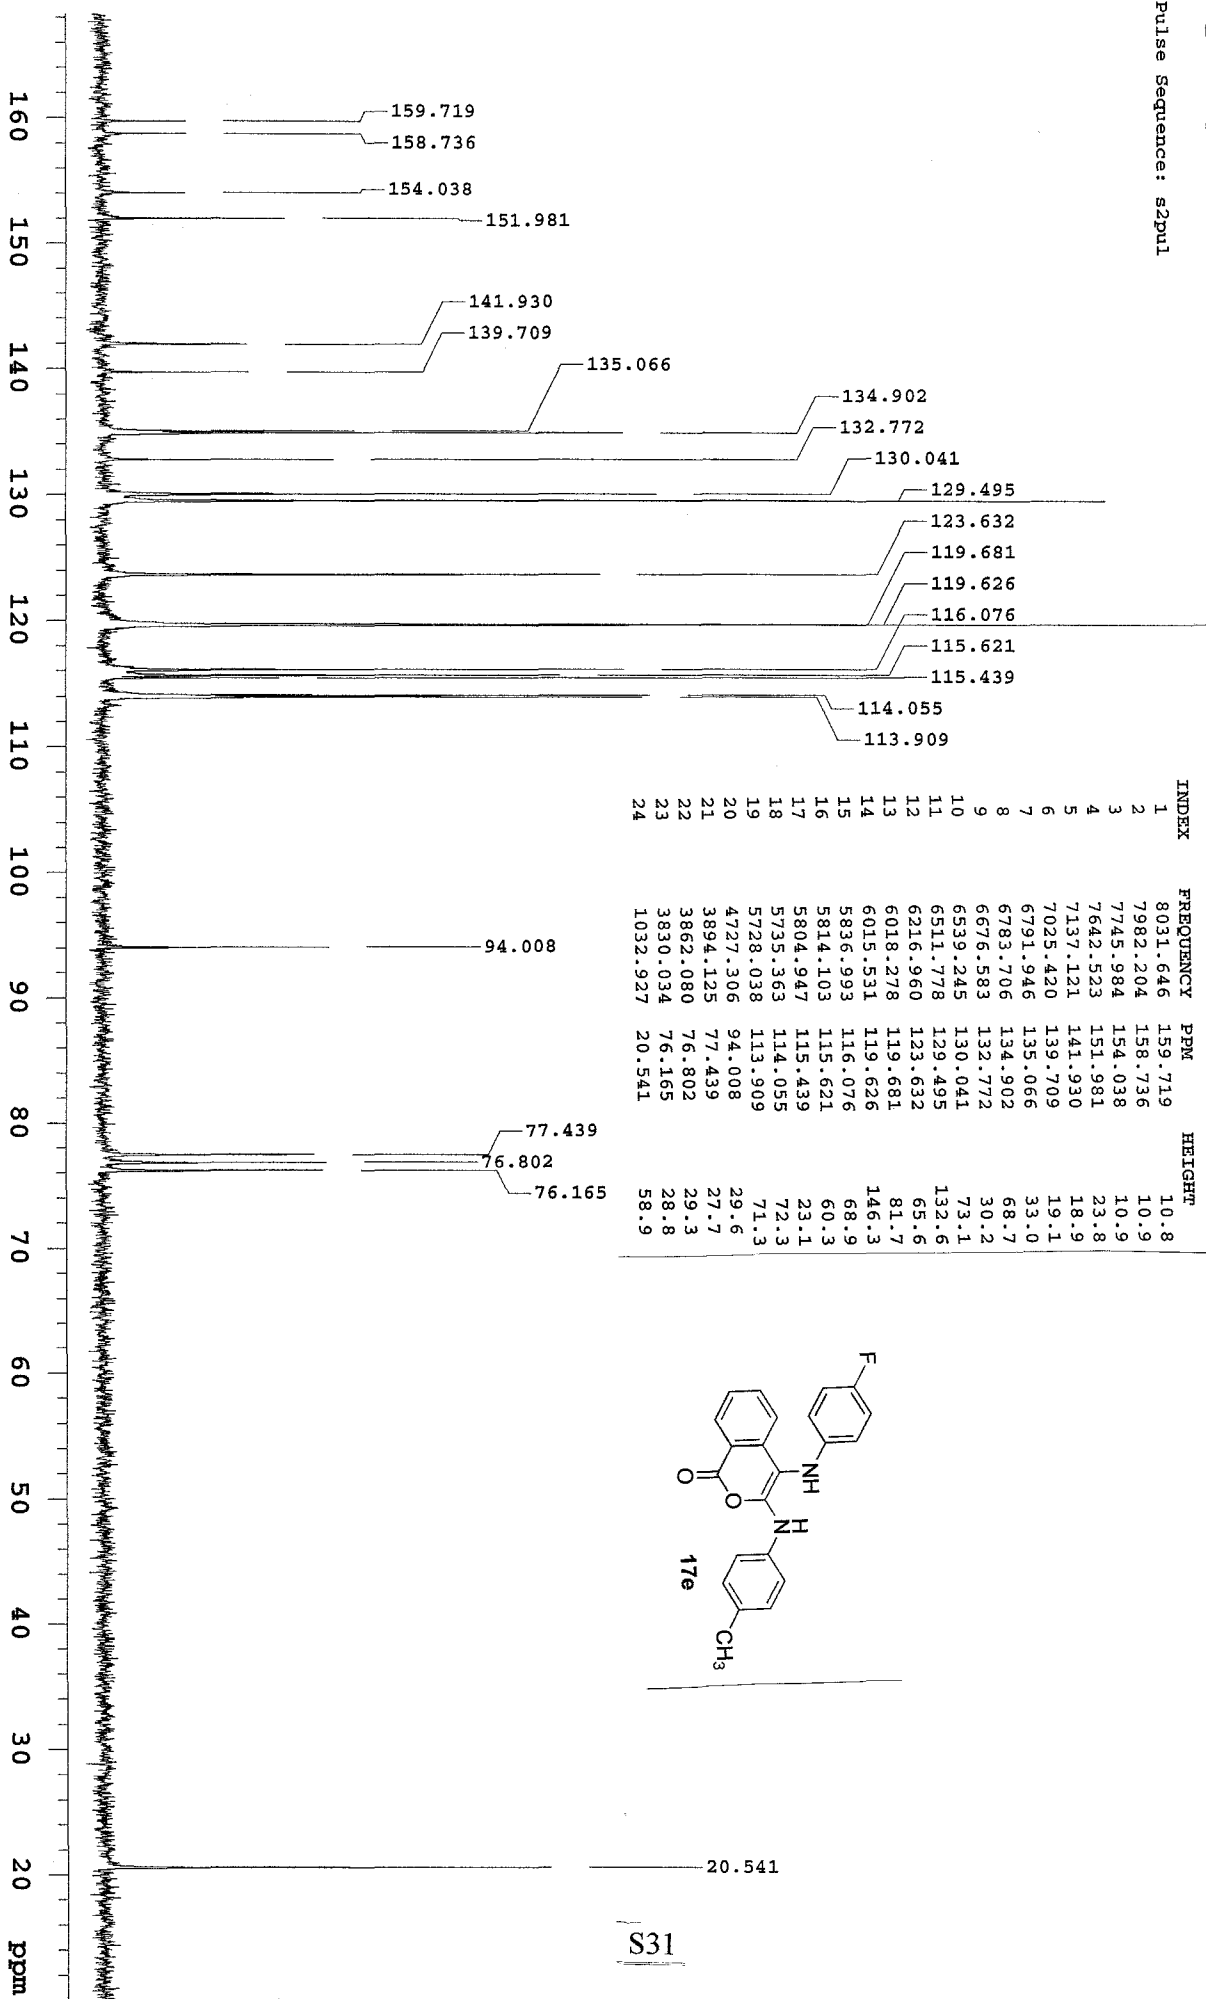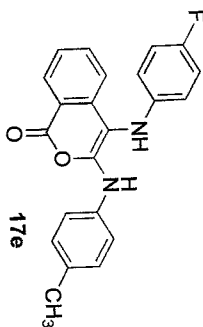

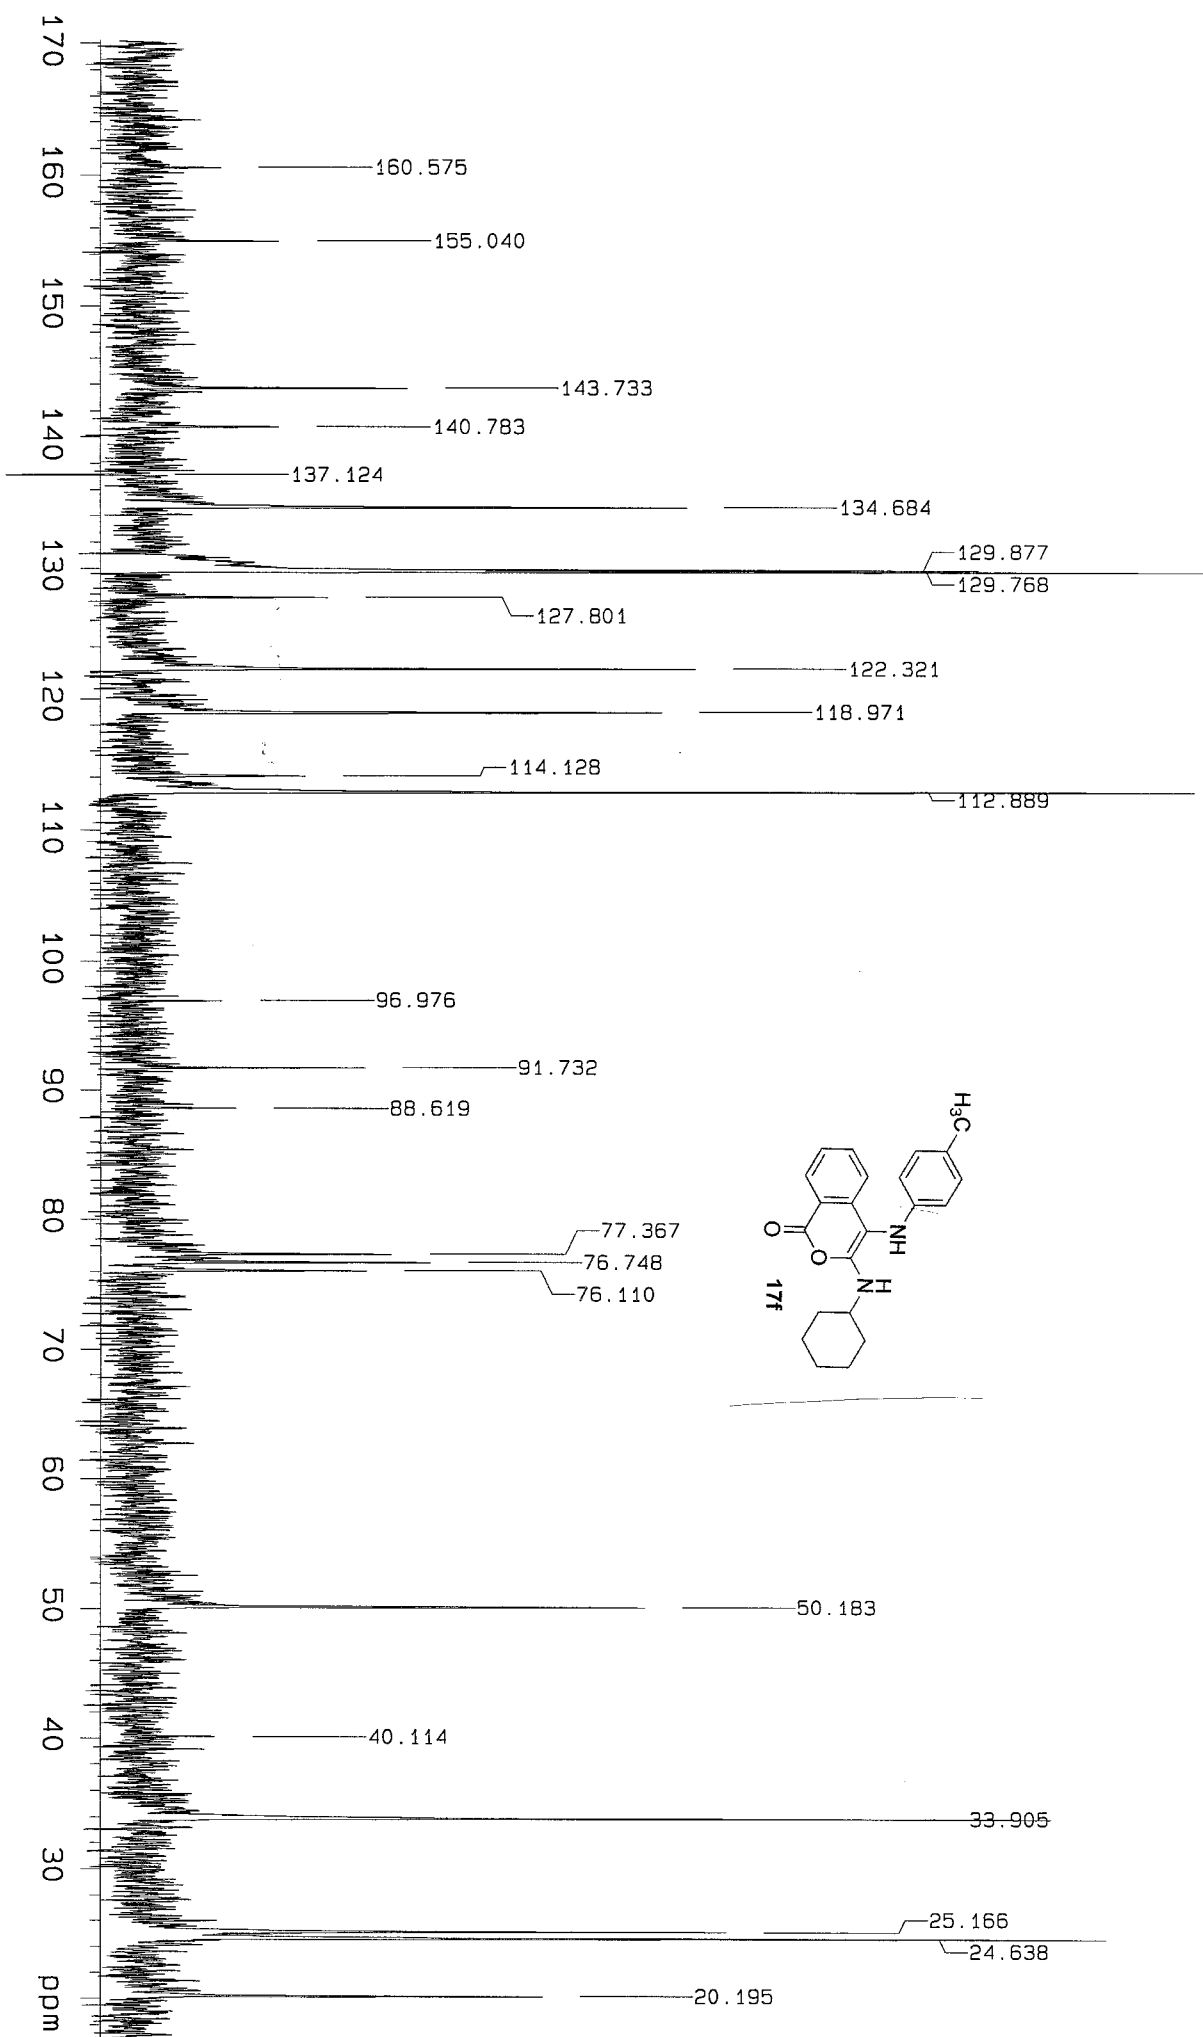

cg\_44-fraz\_1 ossase1 isopr 12:06:09  
Pulse Sequence: s2pu1

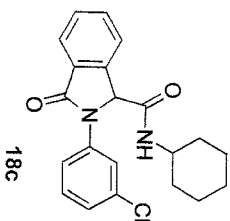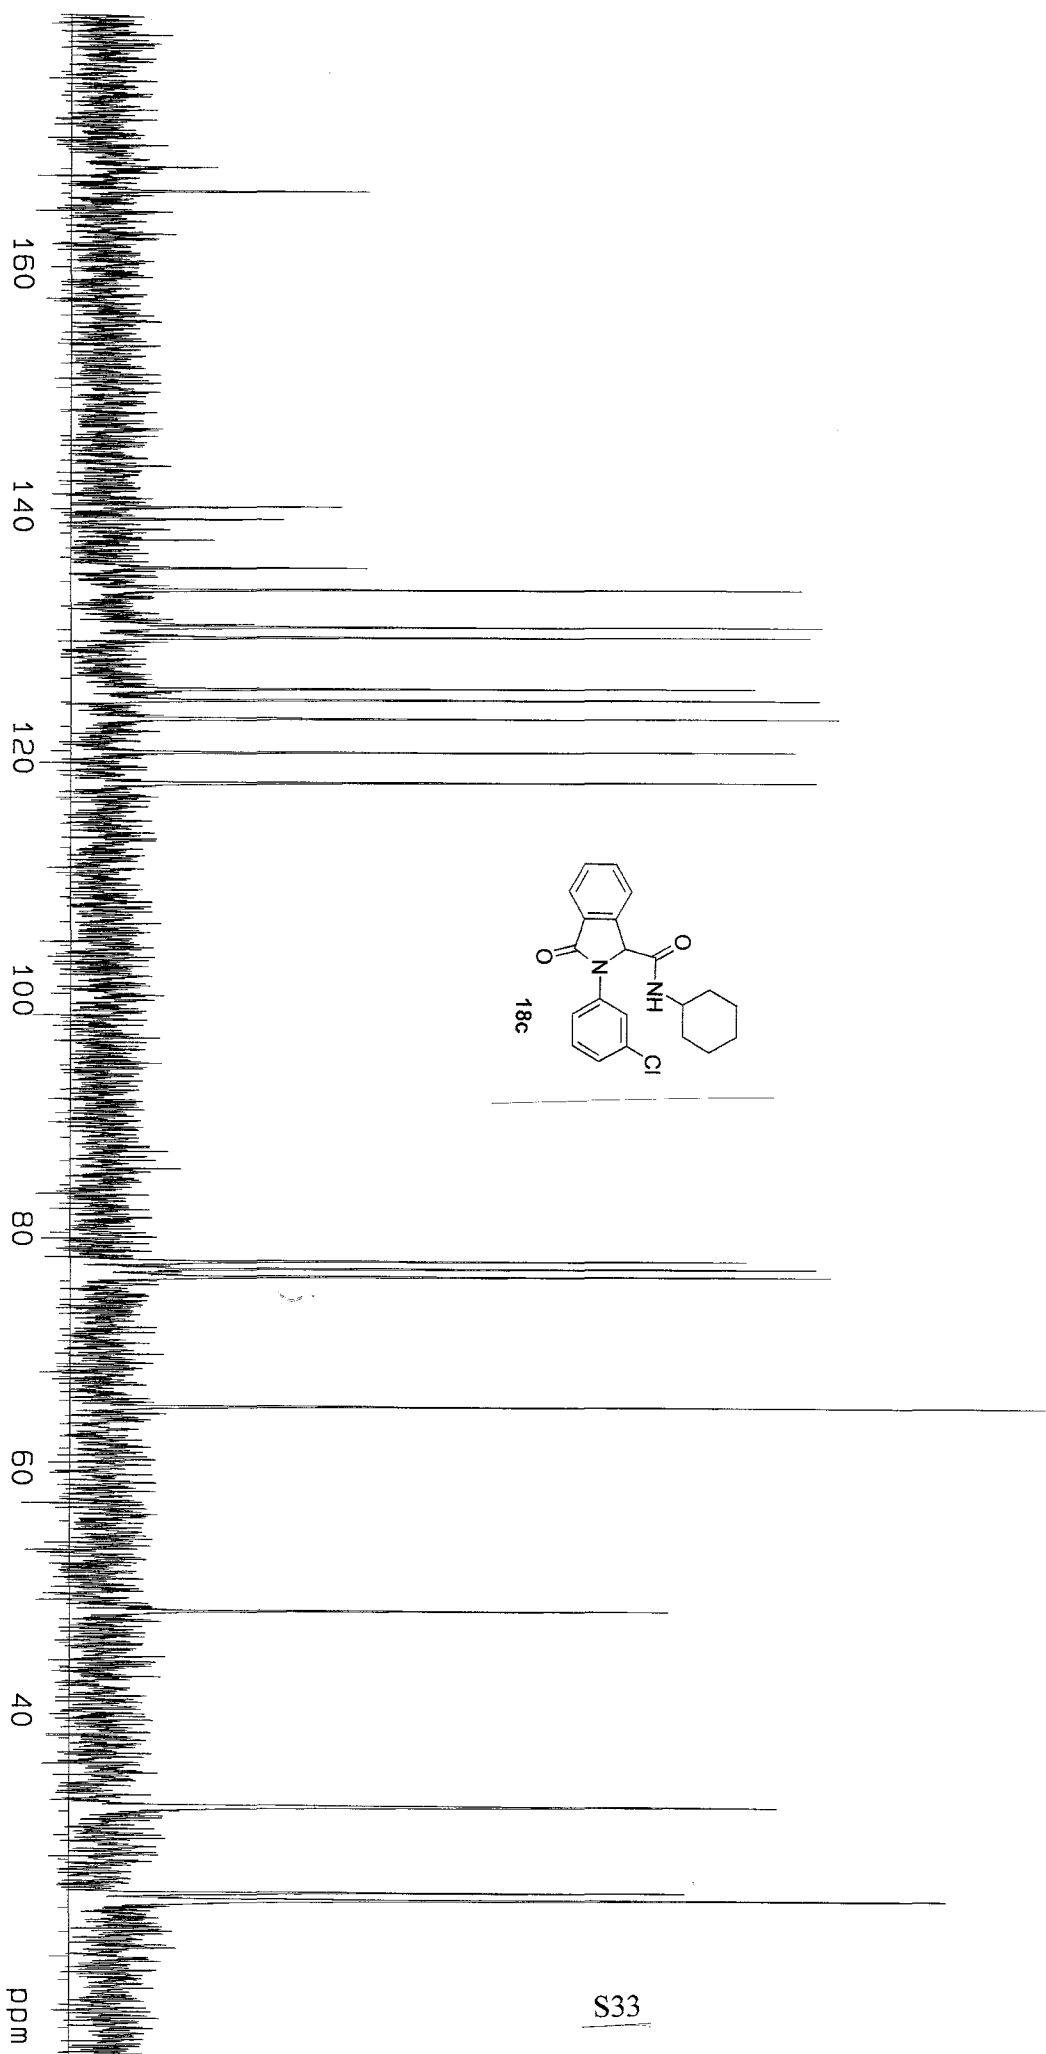

| Pulse Sequence | 13C OBSERVED FREQUENCY (MHz) | PPM     | HEIGHT |
|----------------|------------------------------|---------|--------|
| 1              | 83.40                        | 167.881 | 12.1   |
| 2              | 83.73                        | 166.530 | 27.8   |
| 3              | 7053.854                     | 140.293 | 28.6   |
| 4              | 6801.306                     | 135.270 | 22.4   |
| 5              | 6785.283                     | 134.951 | 27.8   |
| 6              | 6674.650                     | 132.751 | 73.0   |
| 7              | 6583.092                     | 130.930 | 20.3   |
| 8              | 6527.394                     | 129.822 | 142.7  |
| 9              | 6492.297                     | 129.124 | 74.9   |
| 10             | 6234.407                     | 123.995 | 73.0   |
| 11             | 6166.502                     | 122.645 | 73.4   |
| 12             | 6042.898                     | 120.186 | 142.3  |
| 13             | 3908.826                     | 77.742  | 81.7   |
| 14             | 3876.781                     | 77.105  | 80.3   |
| 15             | 3844.735                     | 76.467  | 82.1   |
| 16             | 3298.437                     | 65.602  | 72.0   |
| 17             | 2443.130                     | 48.591  | 66.4   |
| 18             | 1632.076                     | 32.460  | 131.1  |
| 19             | 1275.761                     | 25.373  | 76.4   |
| 20             | 1242.953                     | 24.721  | 82.2   |
| 21             | 1239.901                     | 24.660  | 74.7   |
| 22             | 1060.599                     | 21.094  | 44.3   |

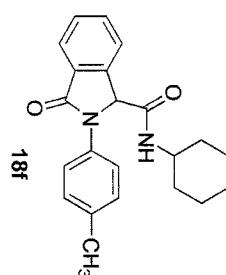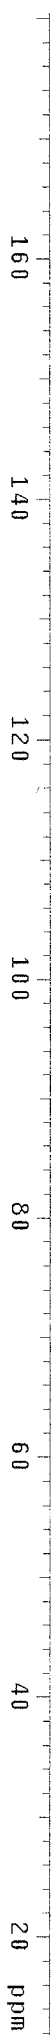

Supplement: Supplementary file 1 [file 4485223]
